# Supplementary material
Source: PubMed Central journal article supplement (PMC7115367)

## Supplementary data

### Design, synthesis, and biological evaluation of novel dipeptide-type SARS-CoV 3CL protease inhibitors: Structure–activity relationship study

Pillaiyar Thanigaimalai,<sup>a</sup> Sho Konno,<sup>a</sup> Takehito Yamamoto,<sup>a</sup> Yuji Koiwai,<sup>a</sup> Akihiro Taguchi,<sup>a</sup> Kentaro Takayama,<sup>a</sup> Fumika Yakushiji,<sup>a</sup> Kenichi Akaji,<sup>b</sup> Yoshiaki Kiso,<sup>b</sup> Yuko Kawasaki,<sup>c</sup> Shen-En Chen,<sup>c</sup> Aurash Naser-Tavakolian,<sup>c</sup> Arne Schön,<sup>c</sup> Ernesto Freire,<sup>c</sup> Yoshio Hayashi<sup>a\*</sup>

<sup>a</sup>Department of Medicinal Chemistry, Tokyo University of Pharmacy and Life Sciences, Tokyo 192-0392, Japan

<sup>b</sup>Department of Medicinal Chemistry, Kyoto Pharmaceutical University, Kyoto 607-8412, Japan

<sup>c</sup>Department of Biology, Johns Hopkins University, Baltimore, MD, USA

\*To whom correspondence should be addressed: Department of Medicinal Chemistry, Tokyo University of Pharmacy and Life Sciences, Tokyo 192-0392, Japan. Tel./Fax: +81 42 676 3275.

E-mail address: yhayashi@toyaku.ac.jp (Y. Hayashi)

|                                                                                                                                                           | Contents: | Page   |
|-----------------------------------------------------------------------------------------------------------------------------------------------------------|-----------|--------|
| <sup>1</sup> H and <sup>13</sup> C NMR spectra for compounds <b>25c</b> , <b>26b</b> , <b>26e</b> , <b>26h</b> , <b>26m</b> , <b>26n</b> and <b>27a</b> . |           | S2-S15 |

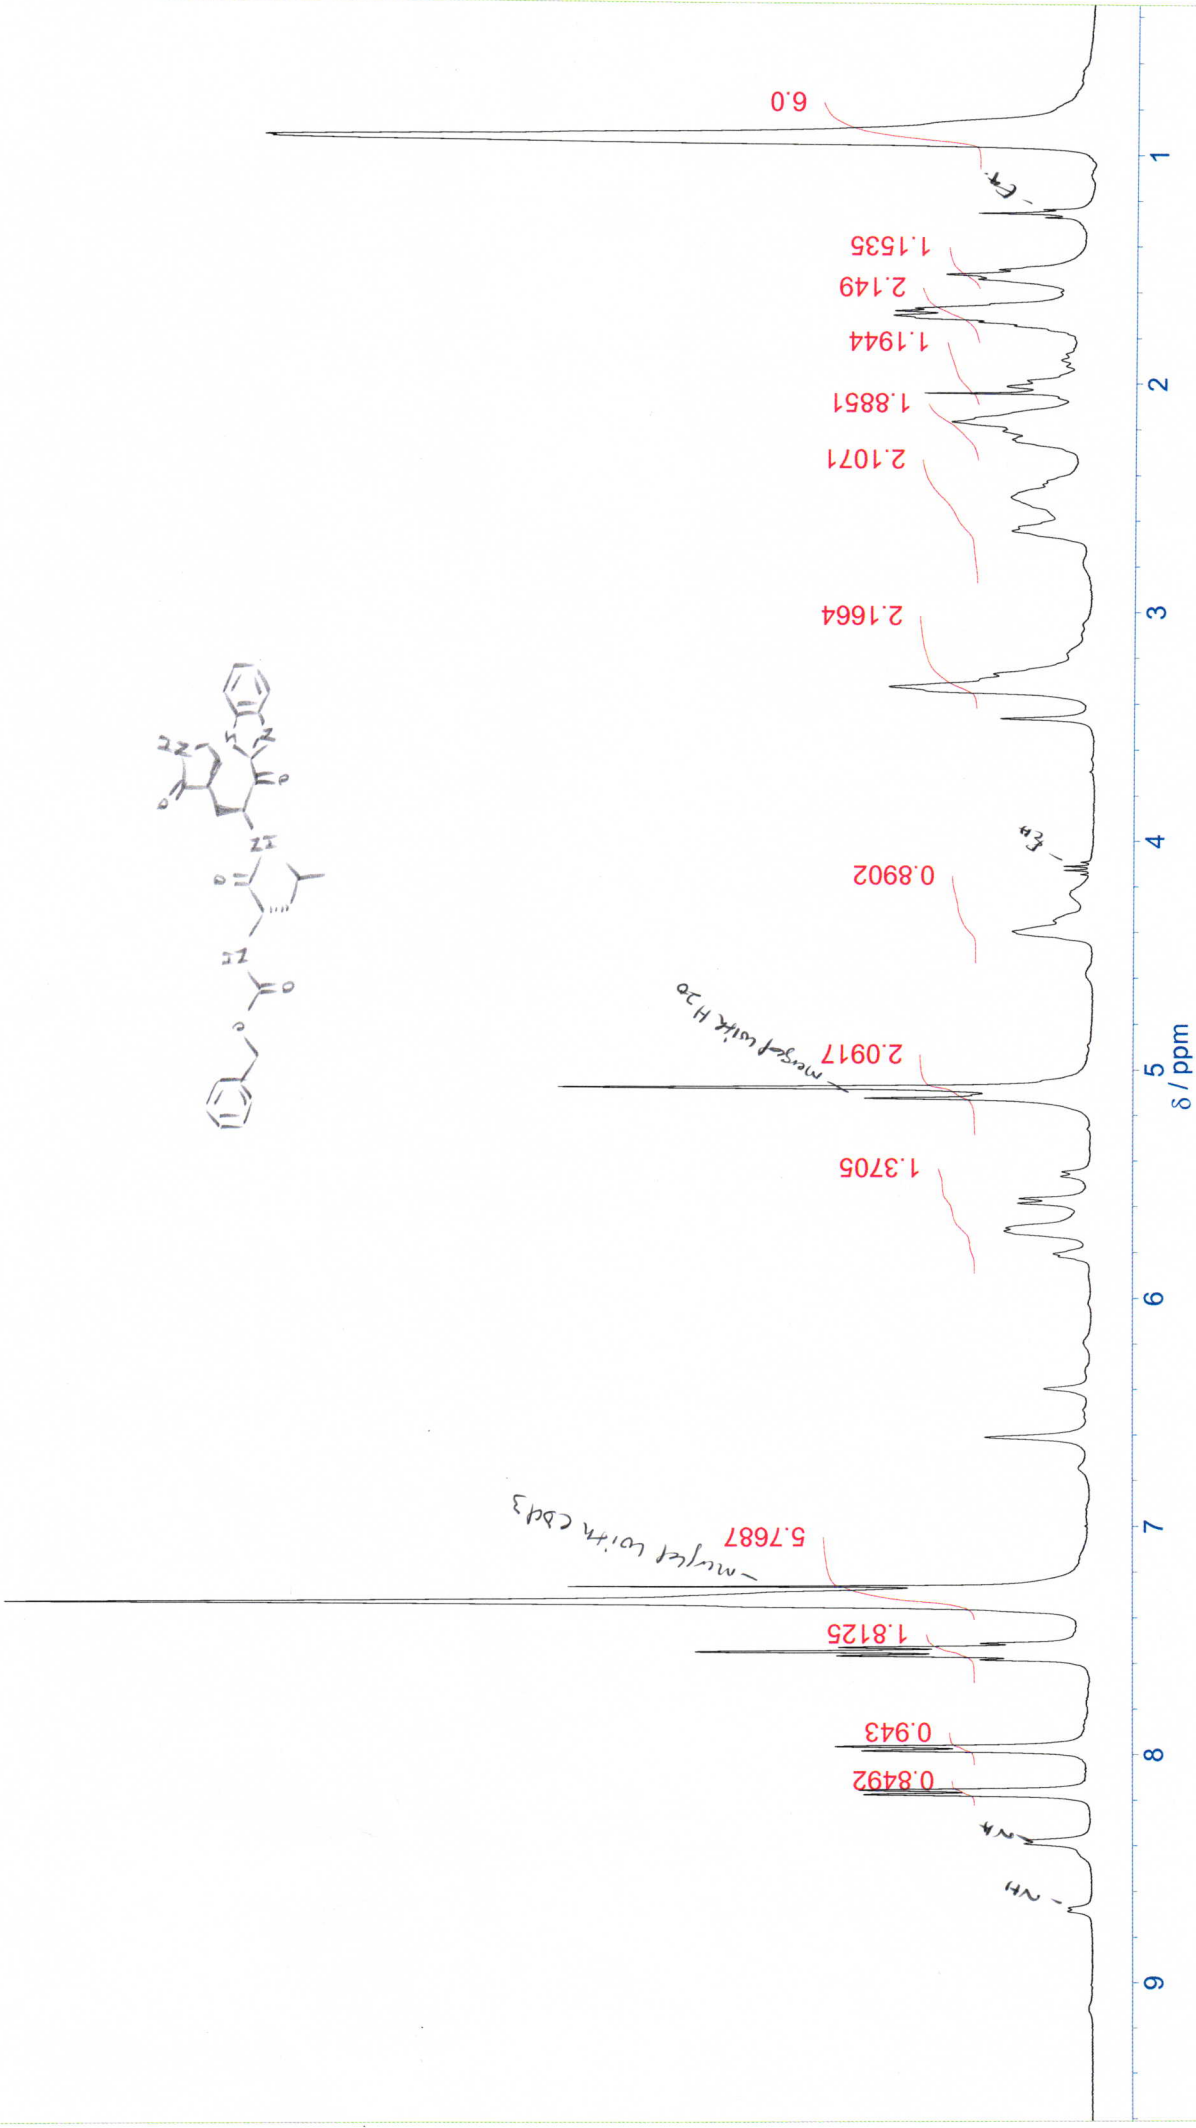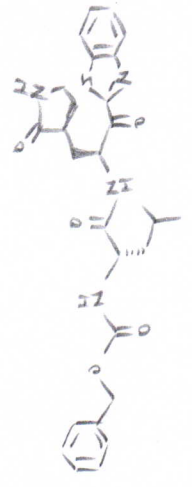

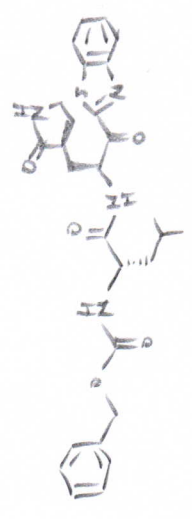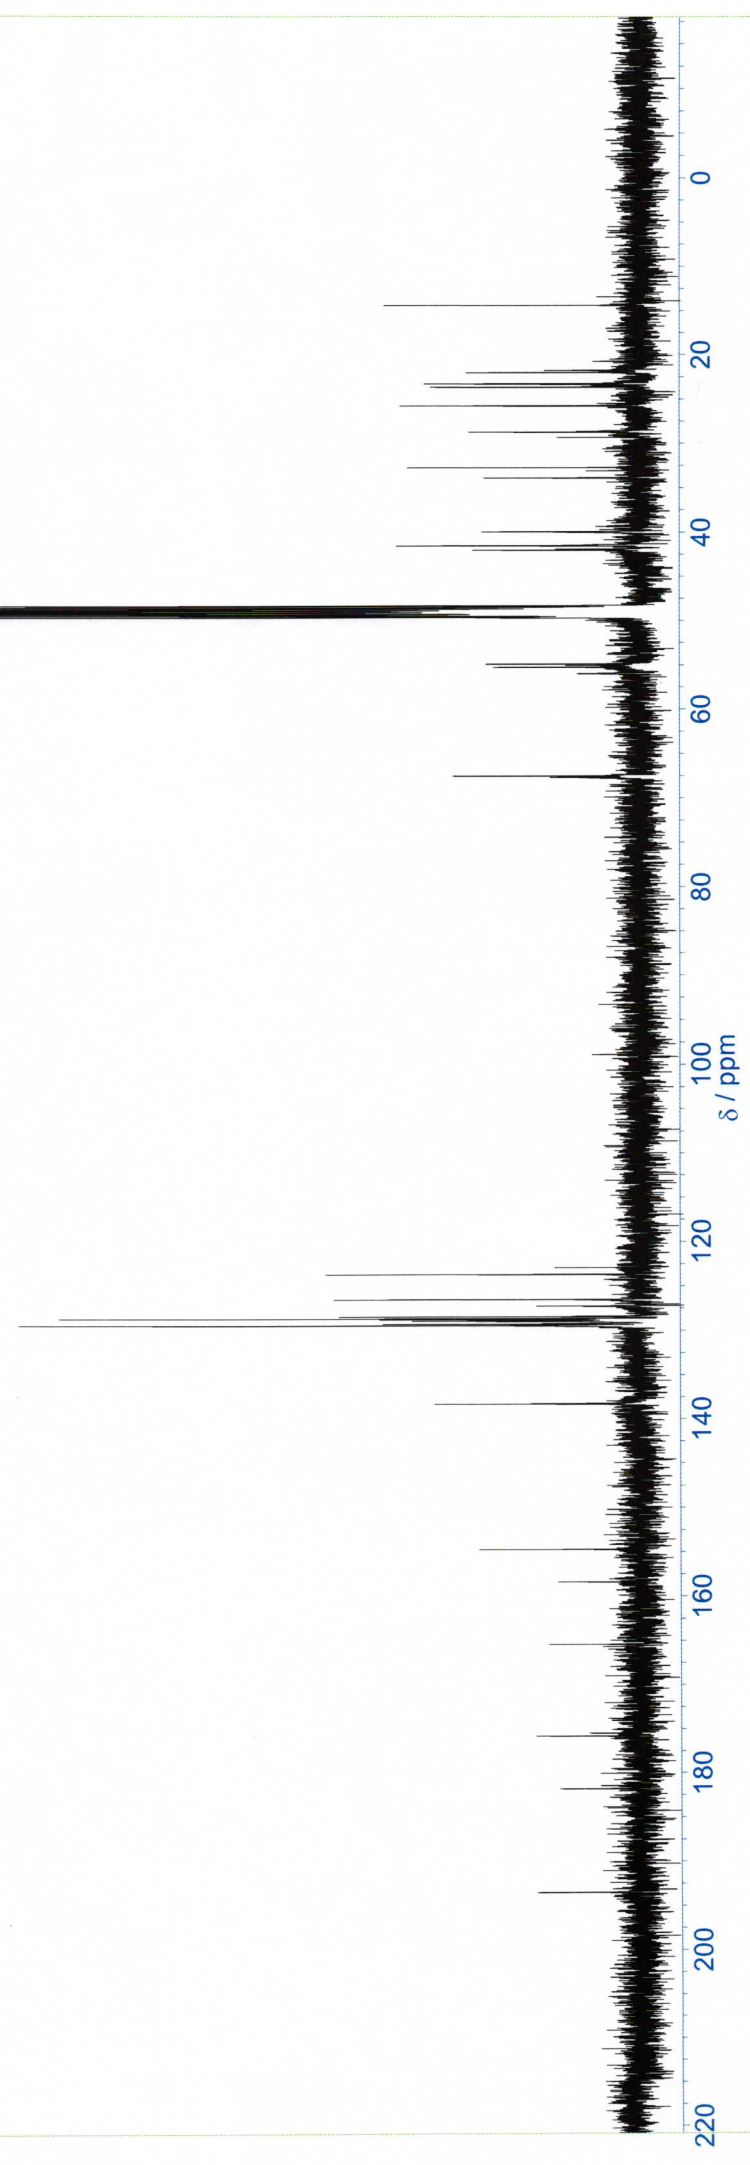

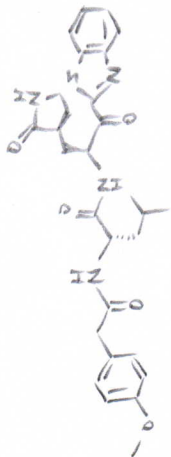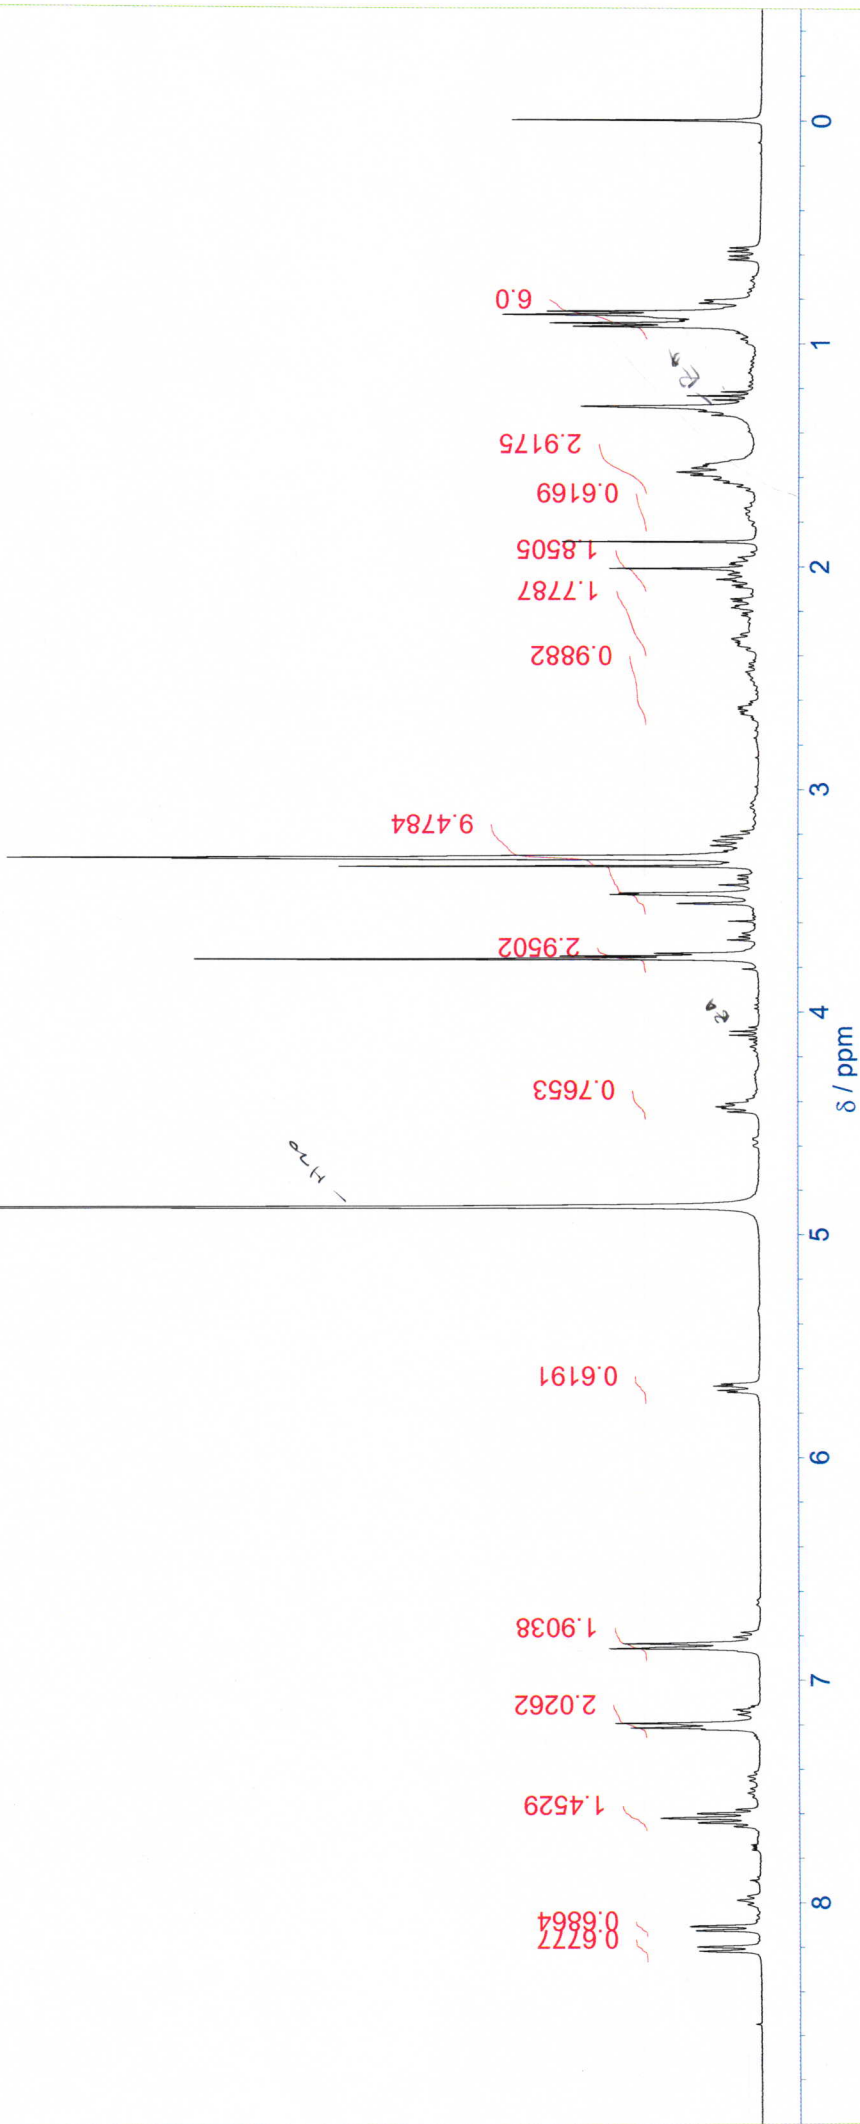

CDCl<sub>3</sub>

26b

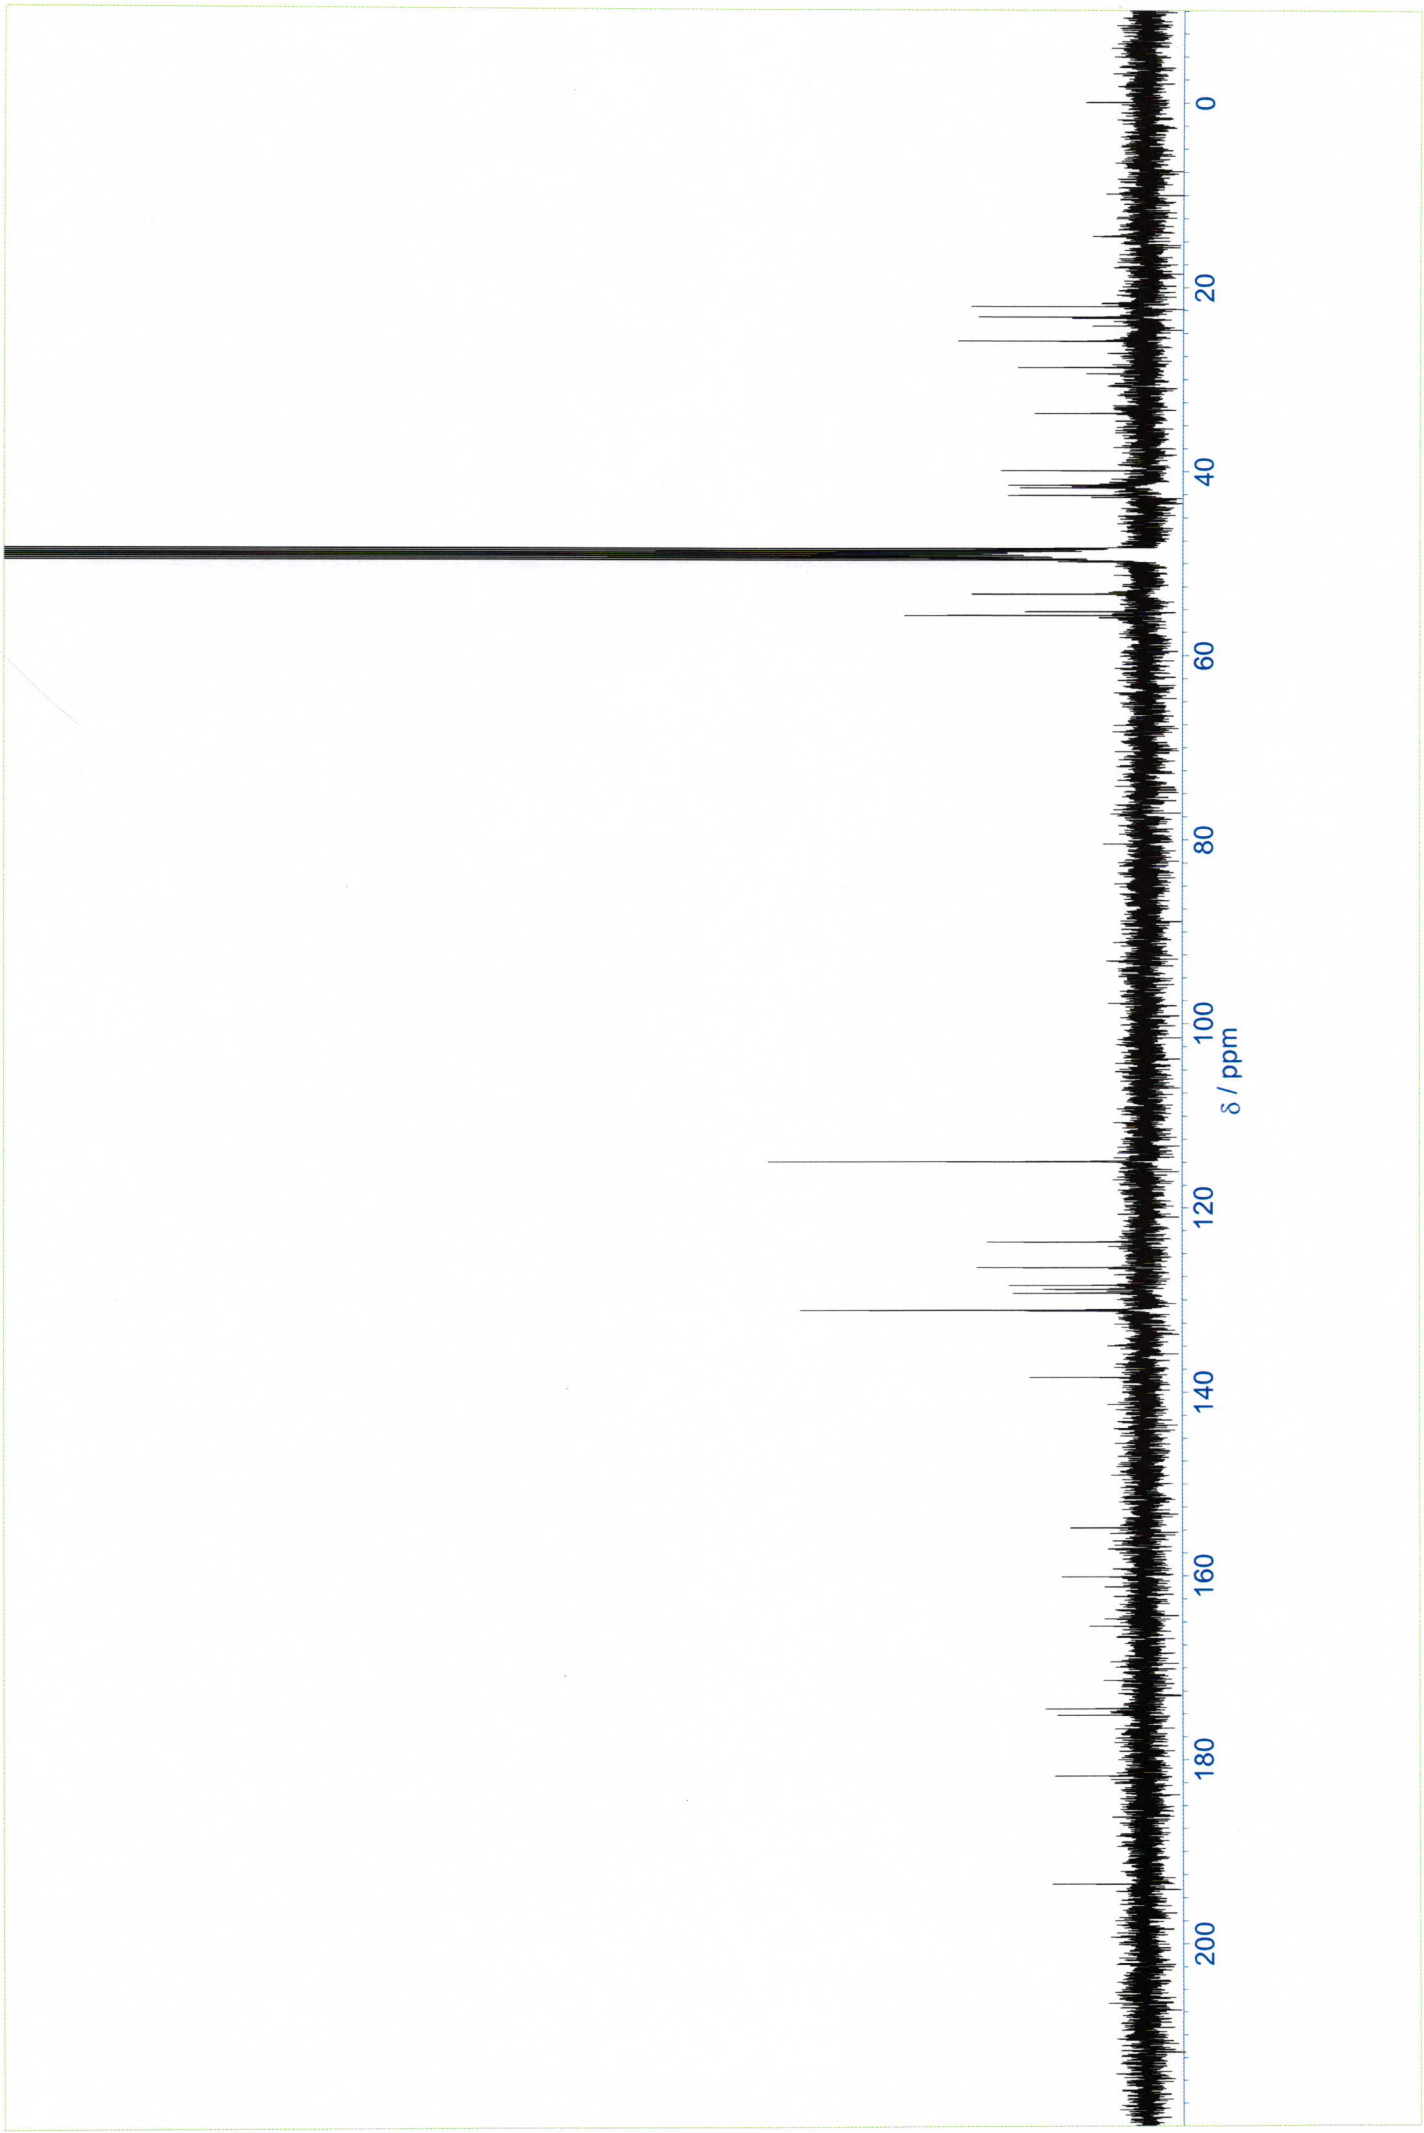

7.9254

2.9438

1.6905

2.4819

1.8059

2.1981

0.7095

1.0

1.1101

0.5673

4.6876

2.1696

1.0228

1.0627

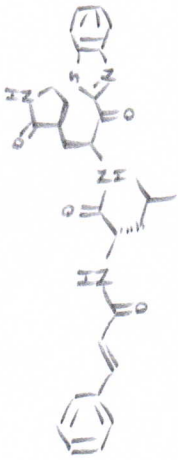

0 1 2 3 4 5 6 7 8  $\delta$  / ppm

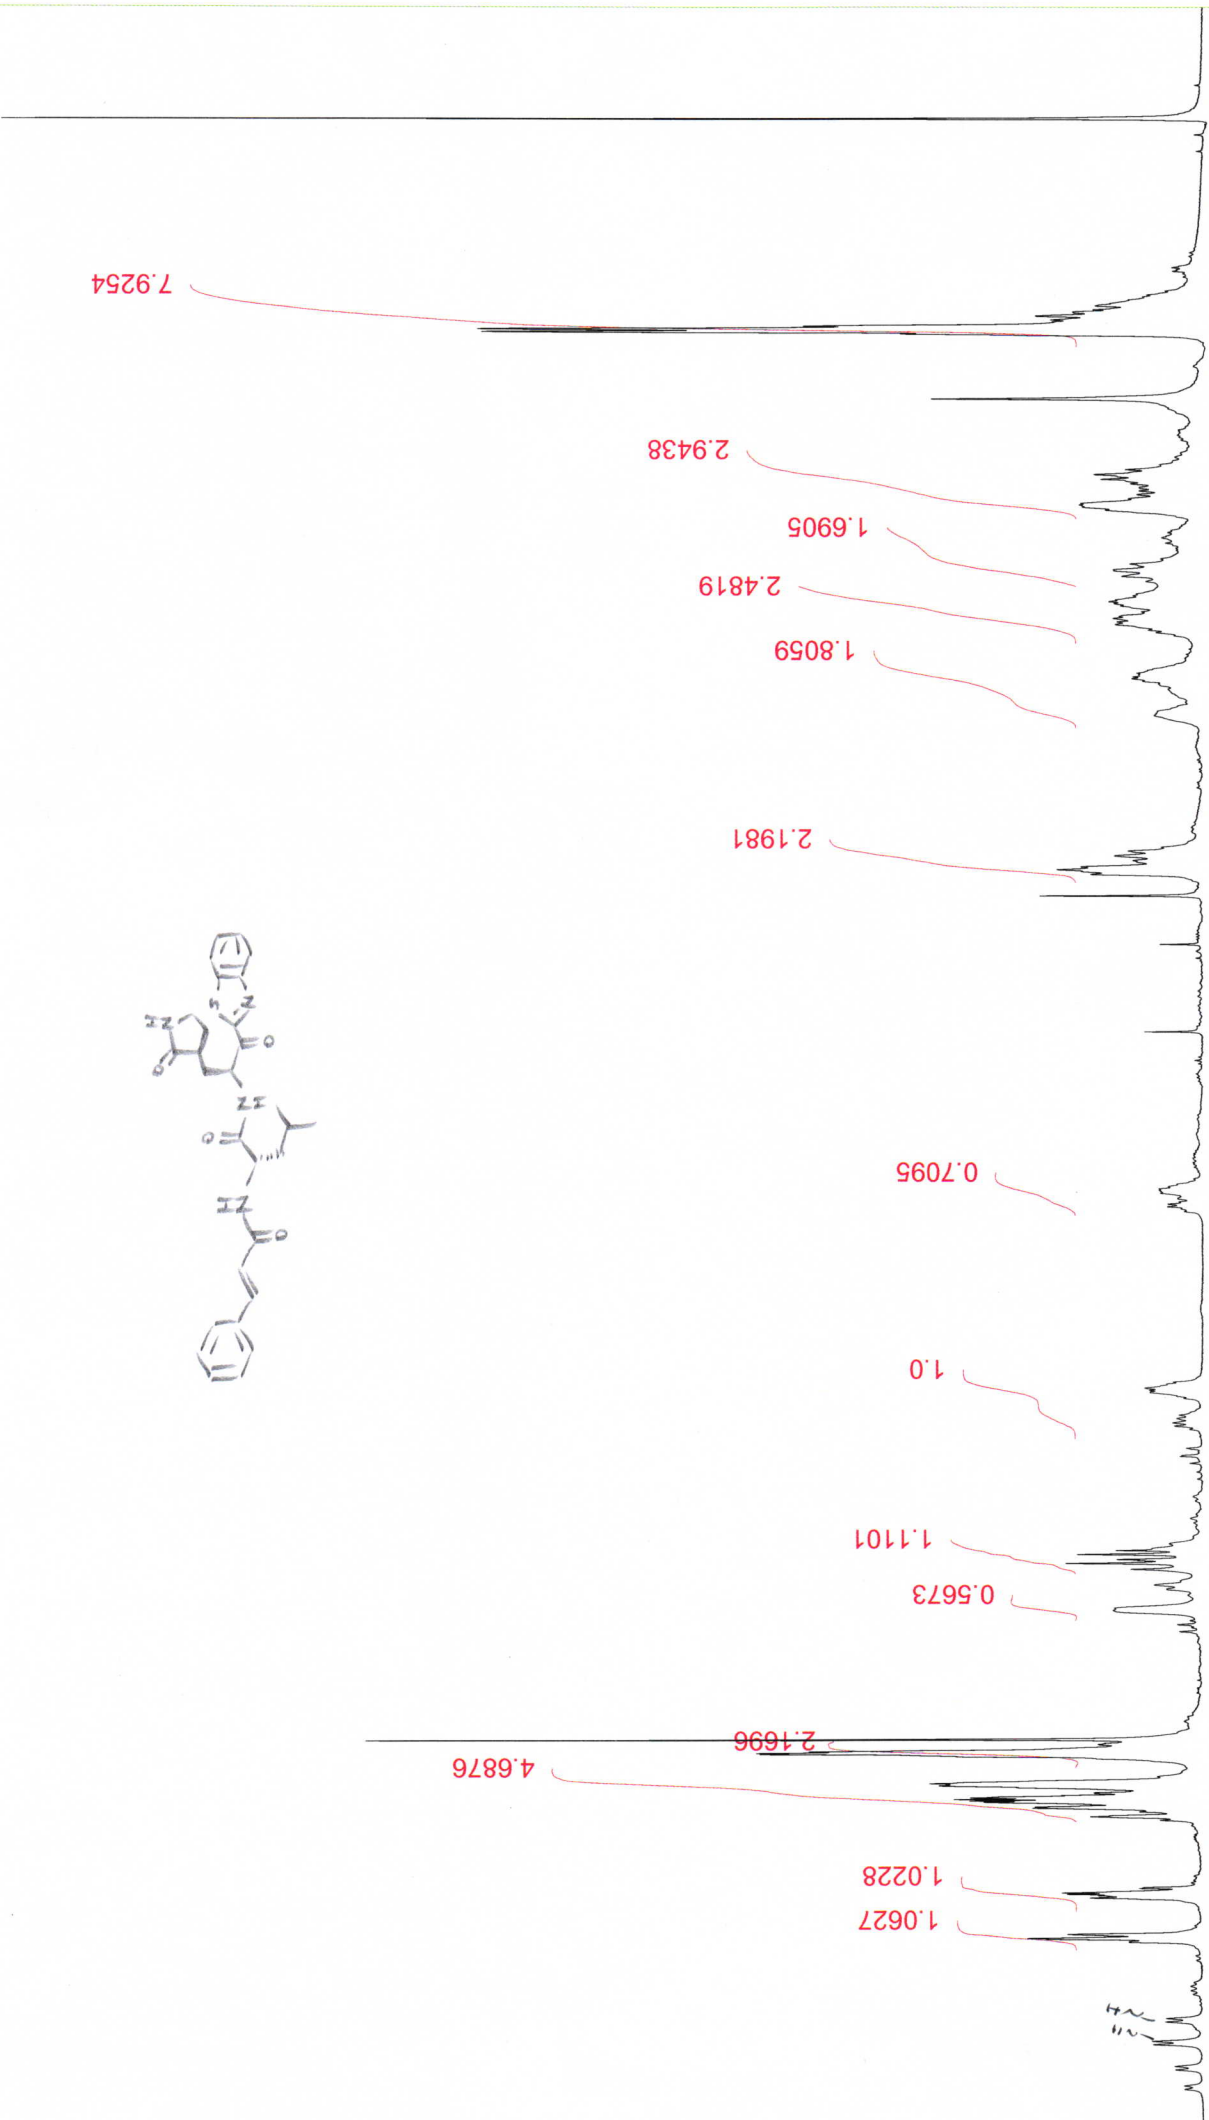

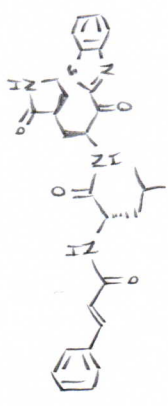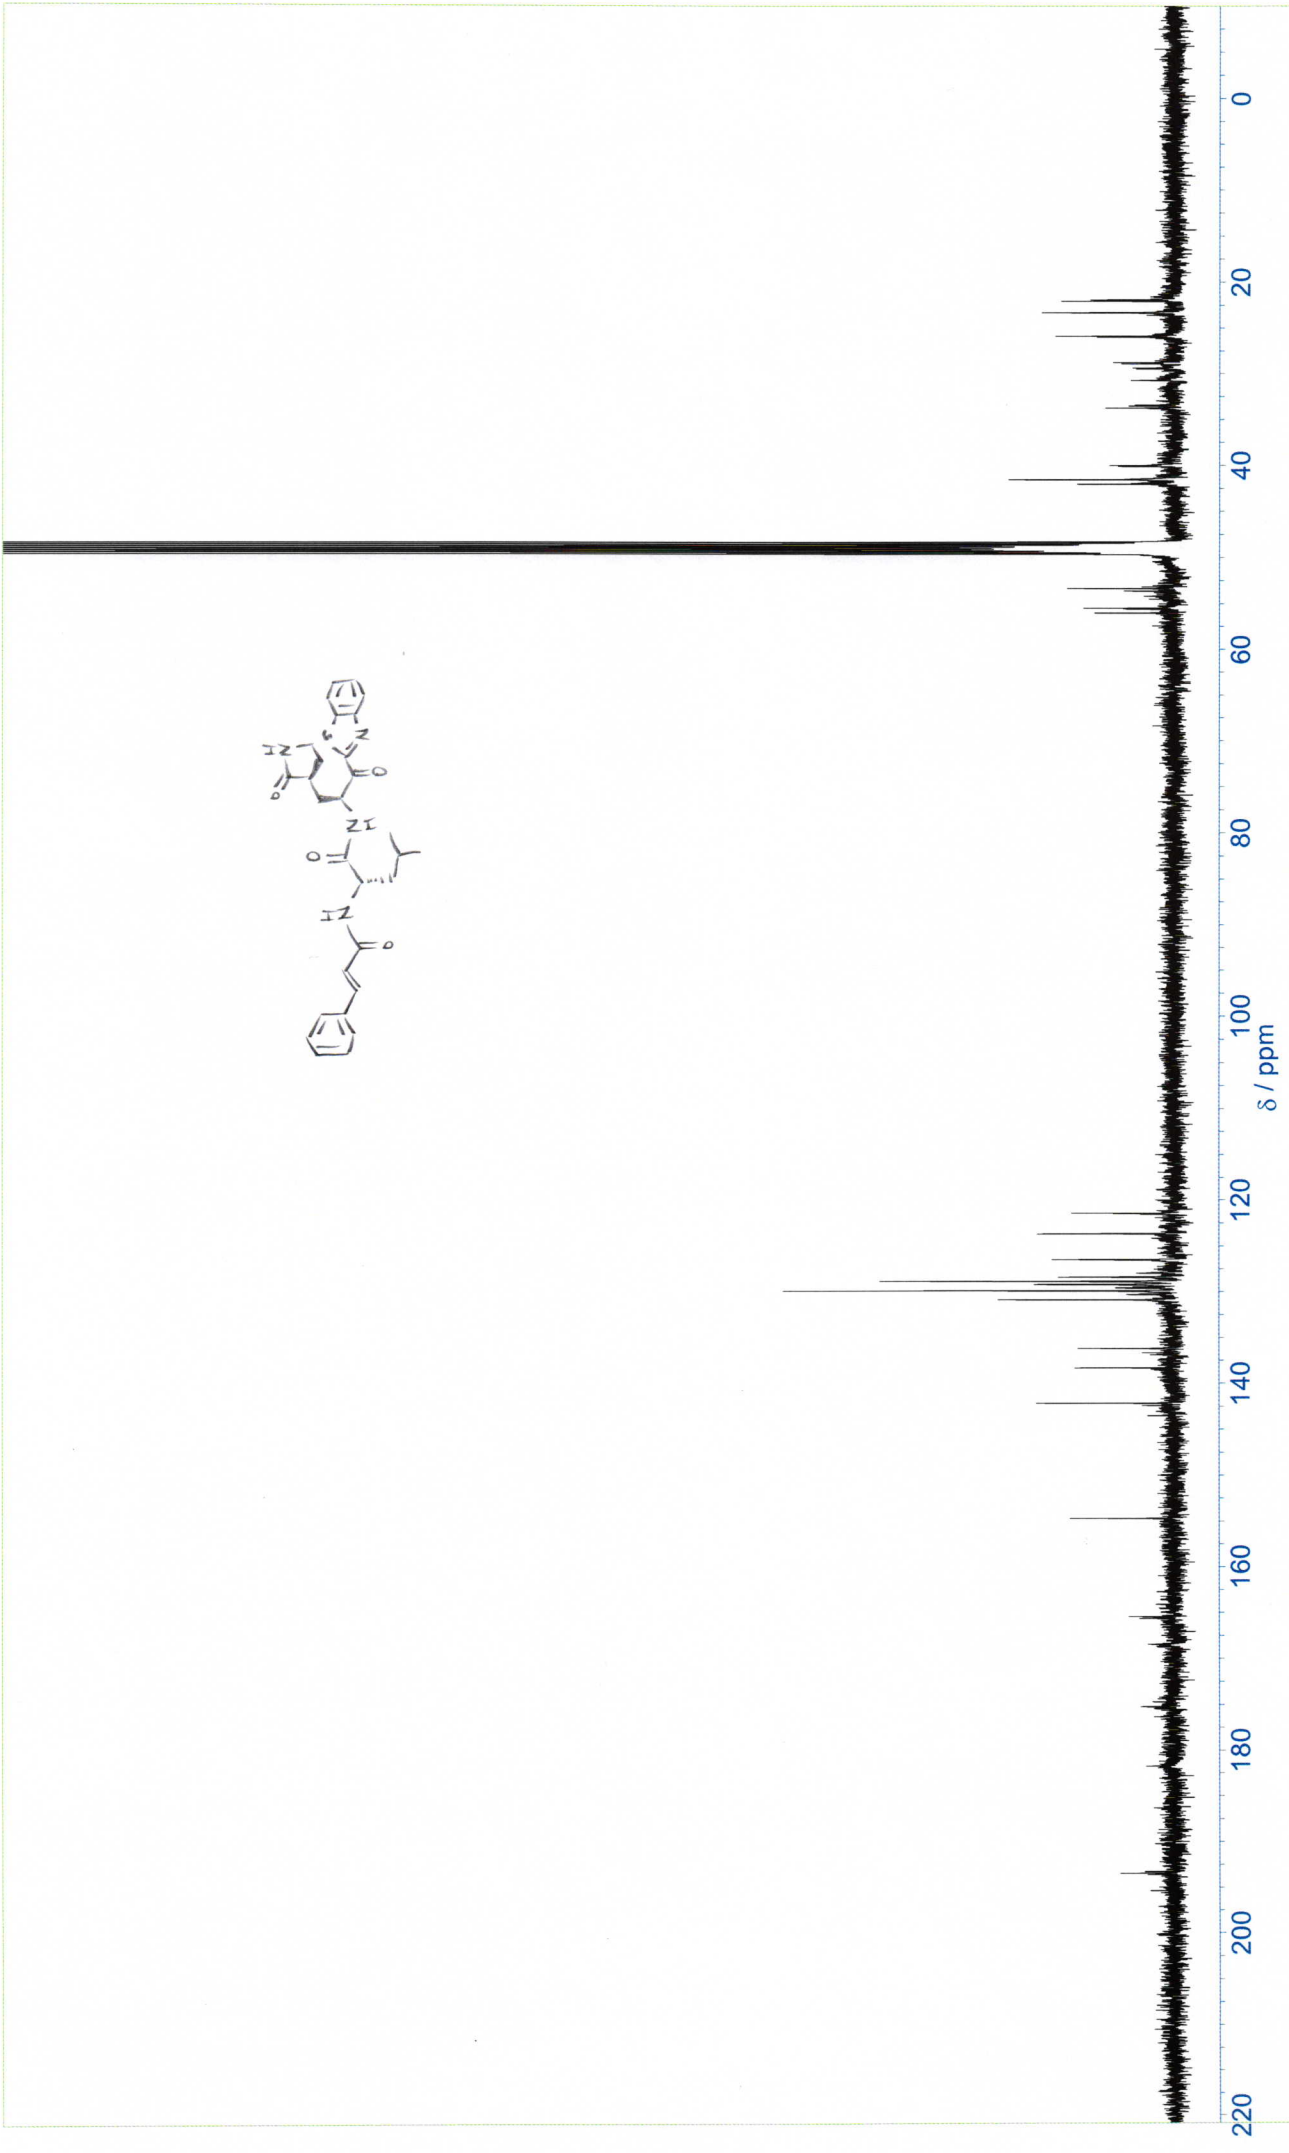



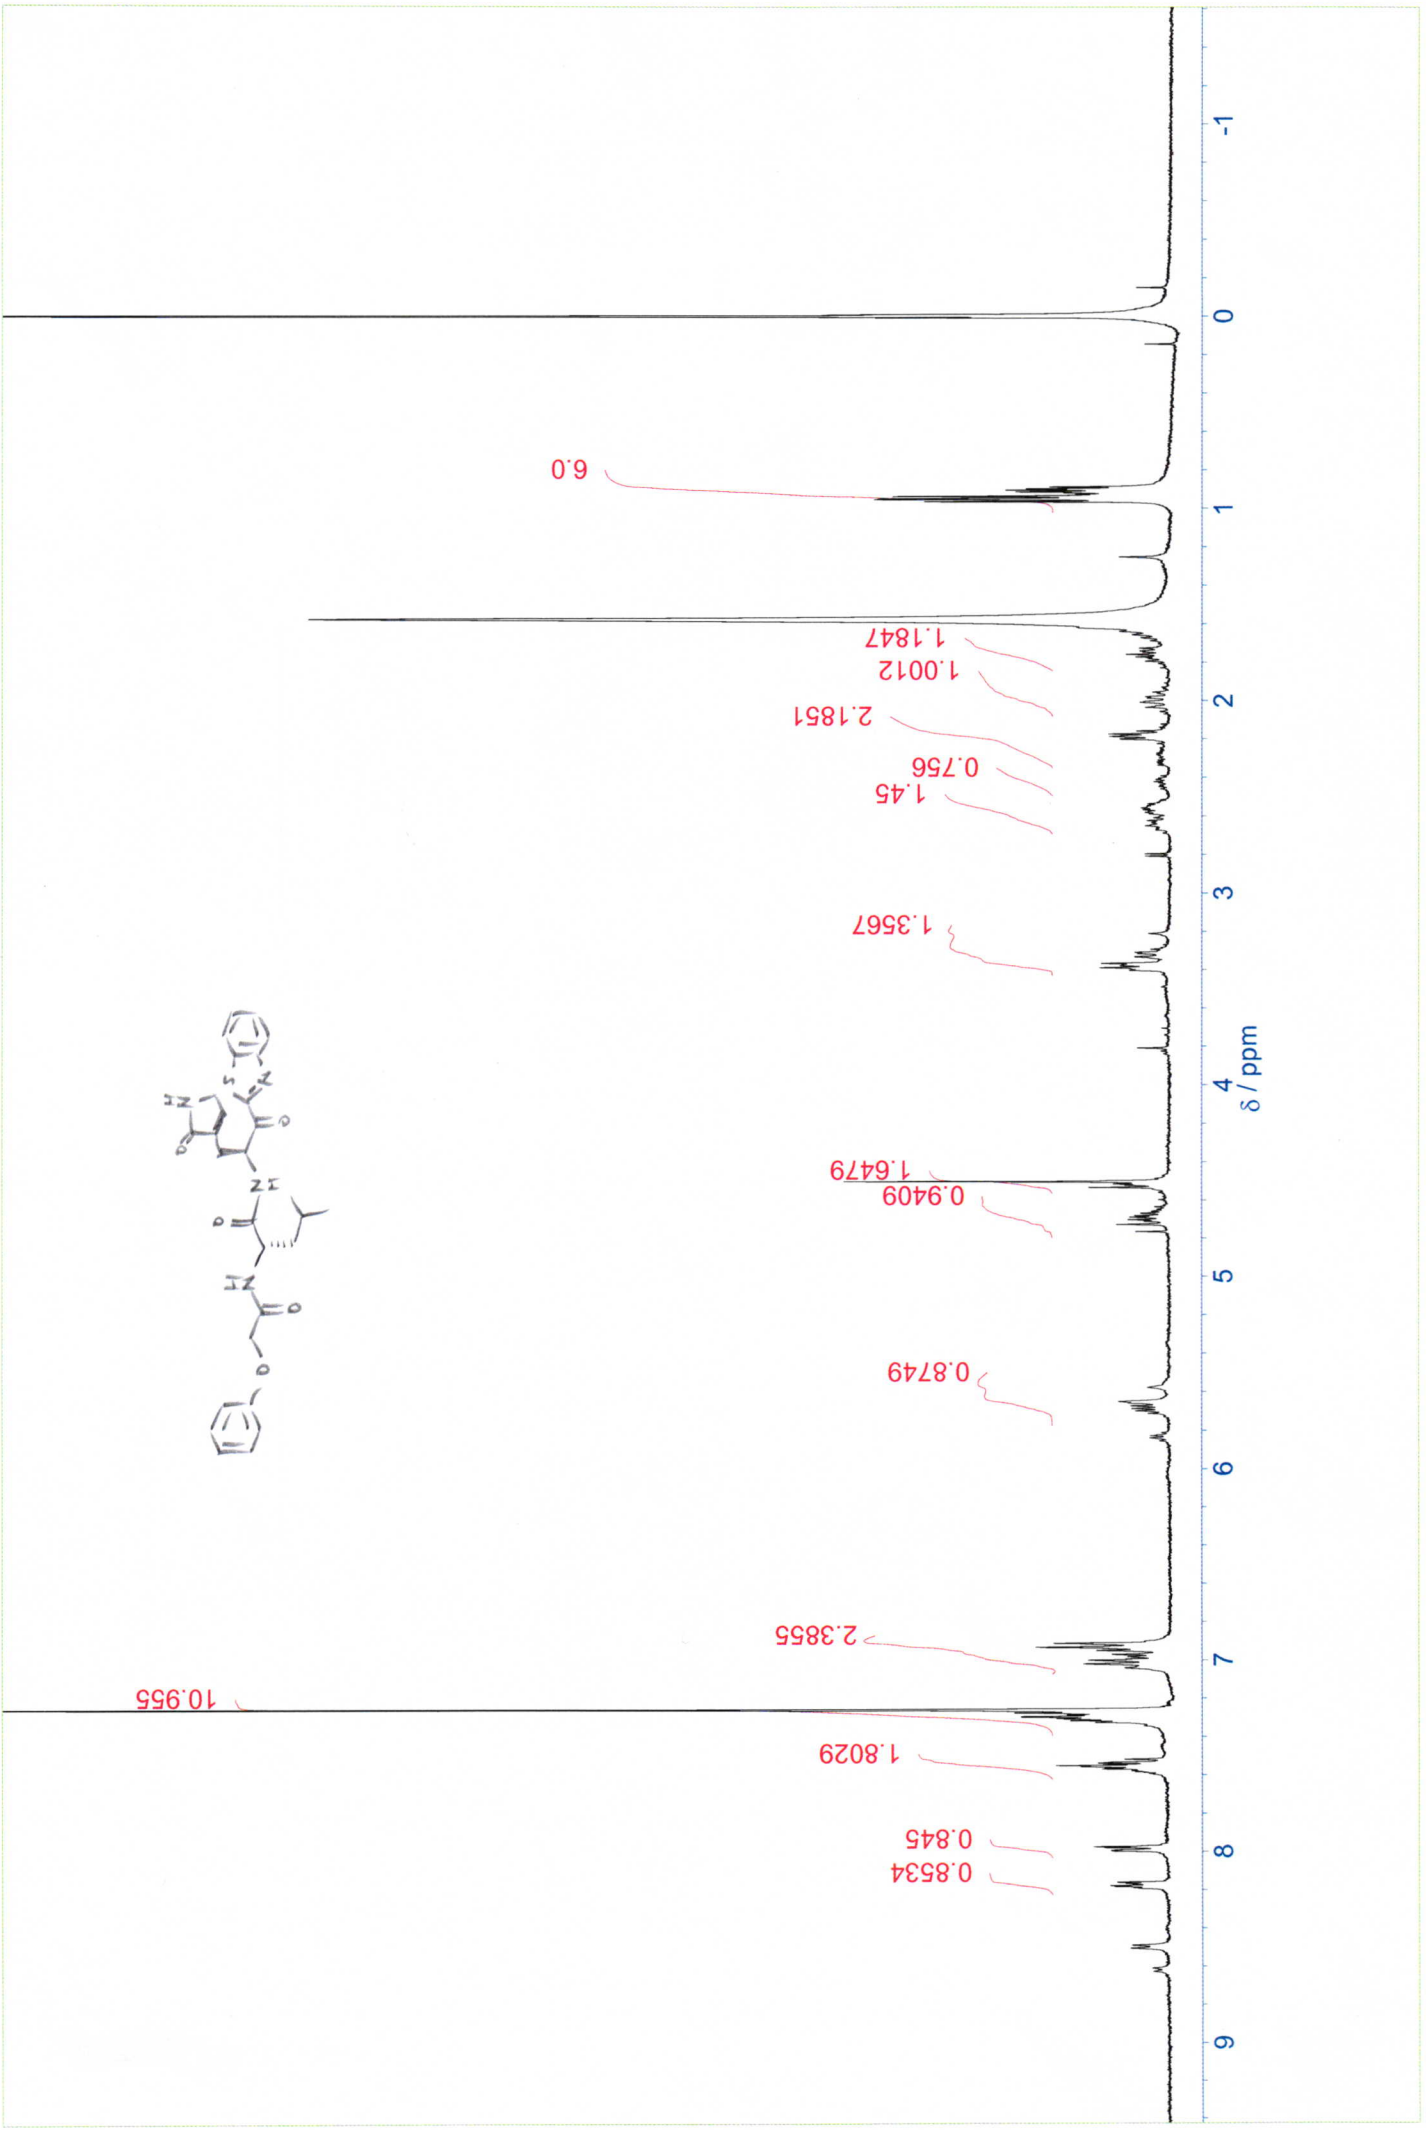



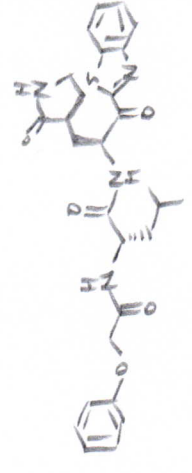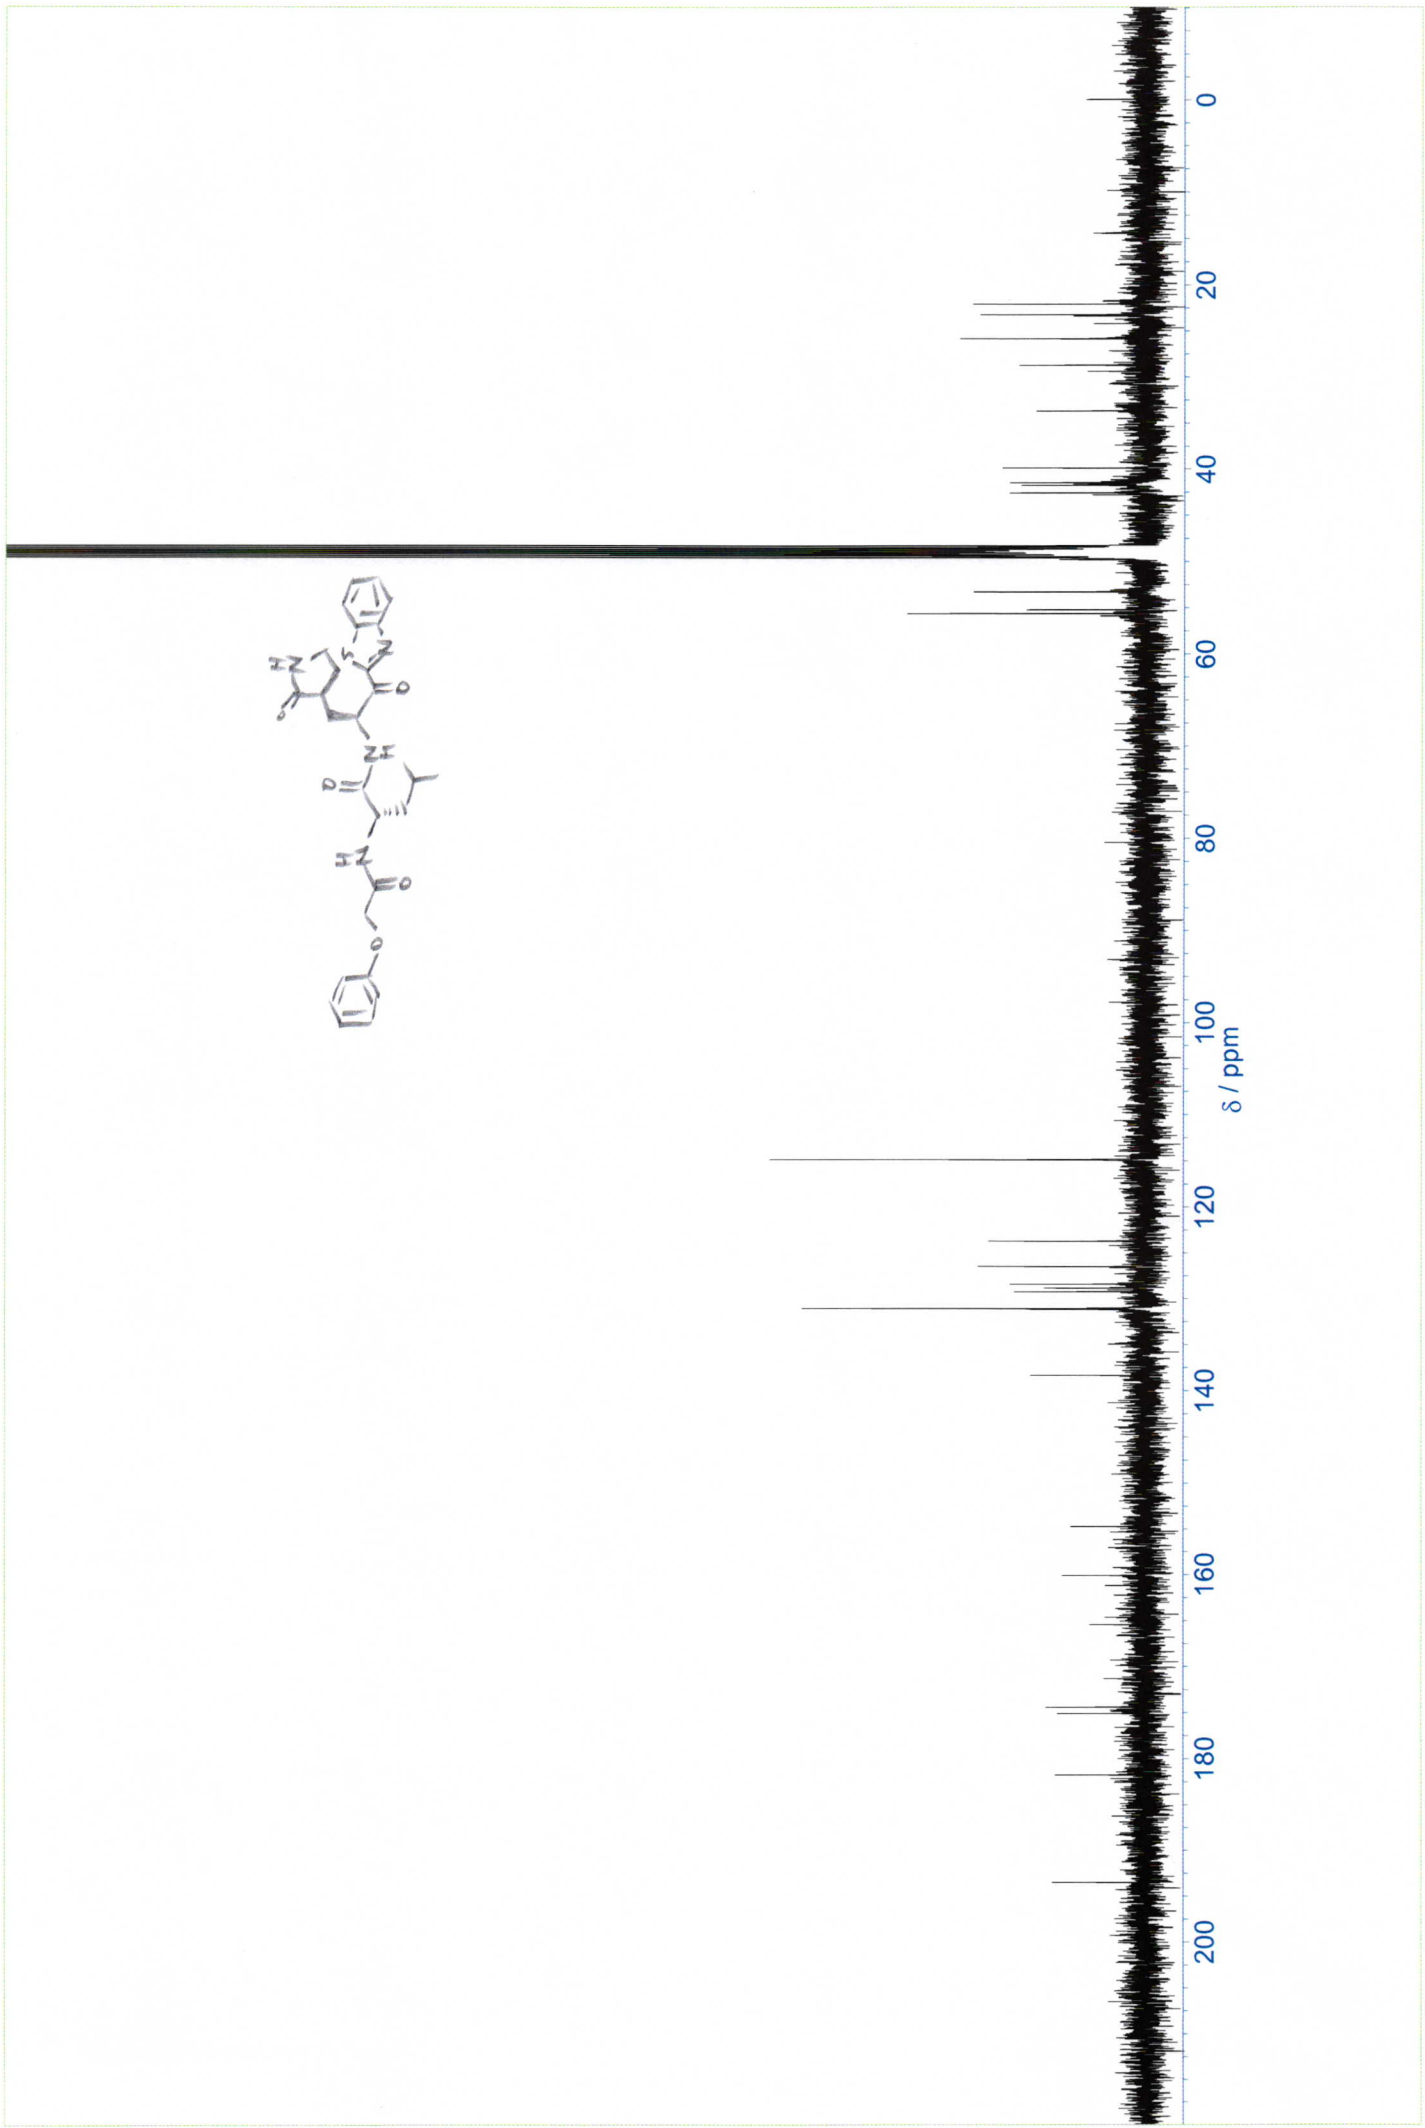

26m

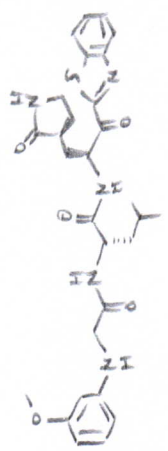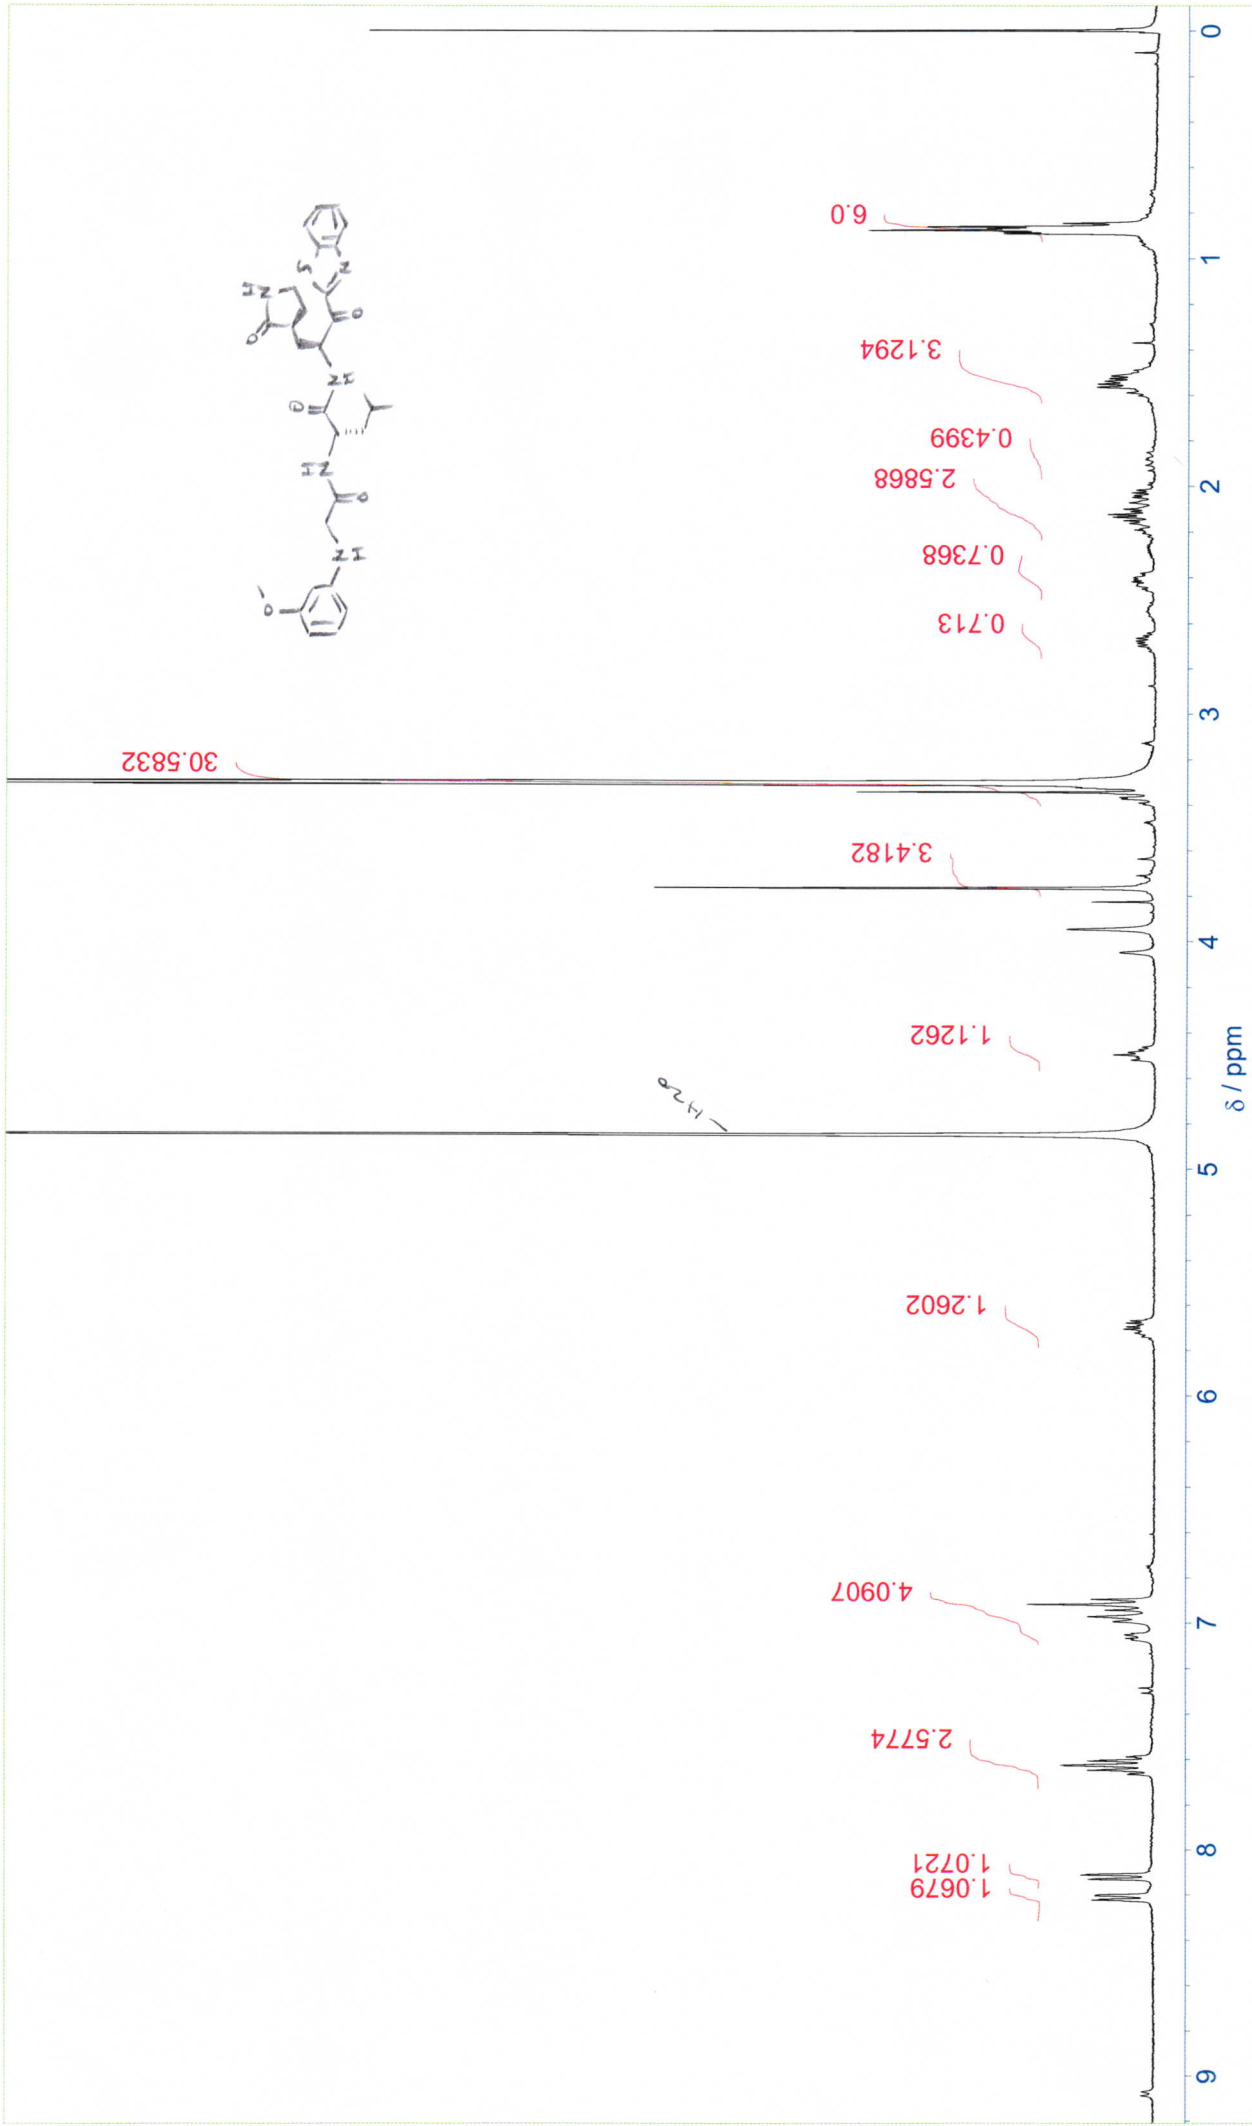

4.20

26m

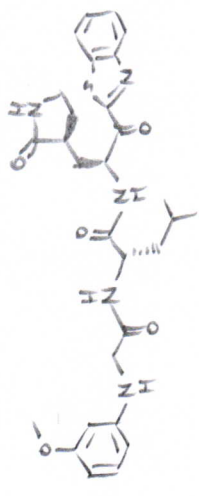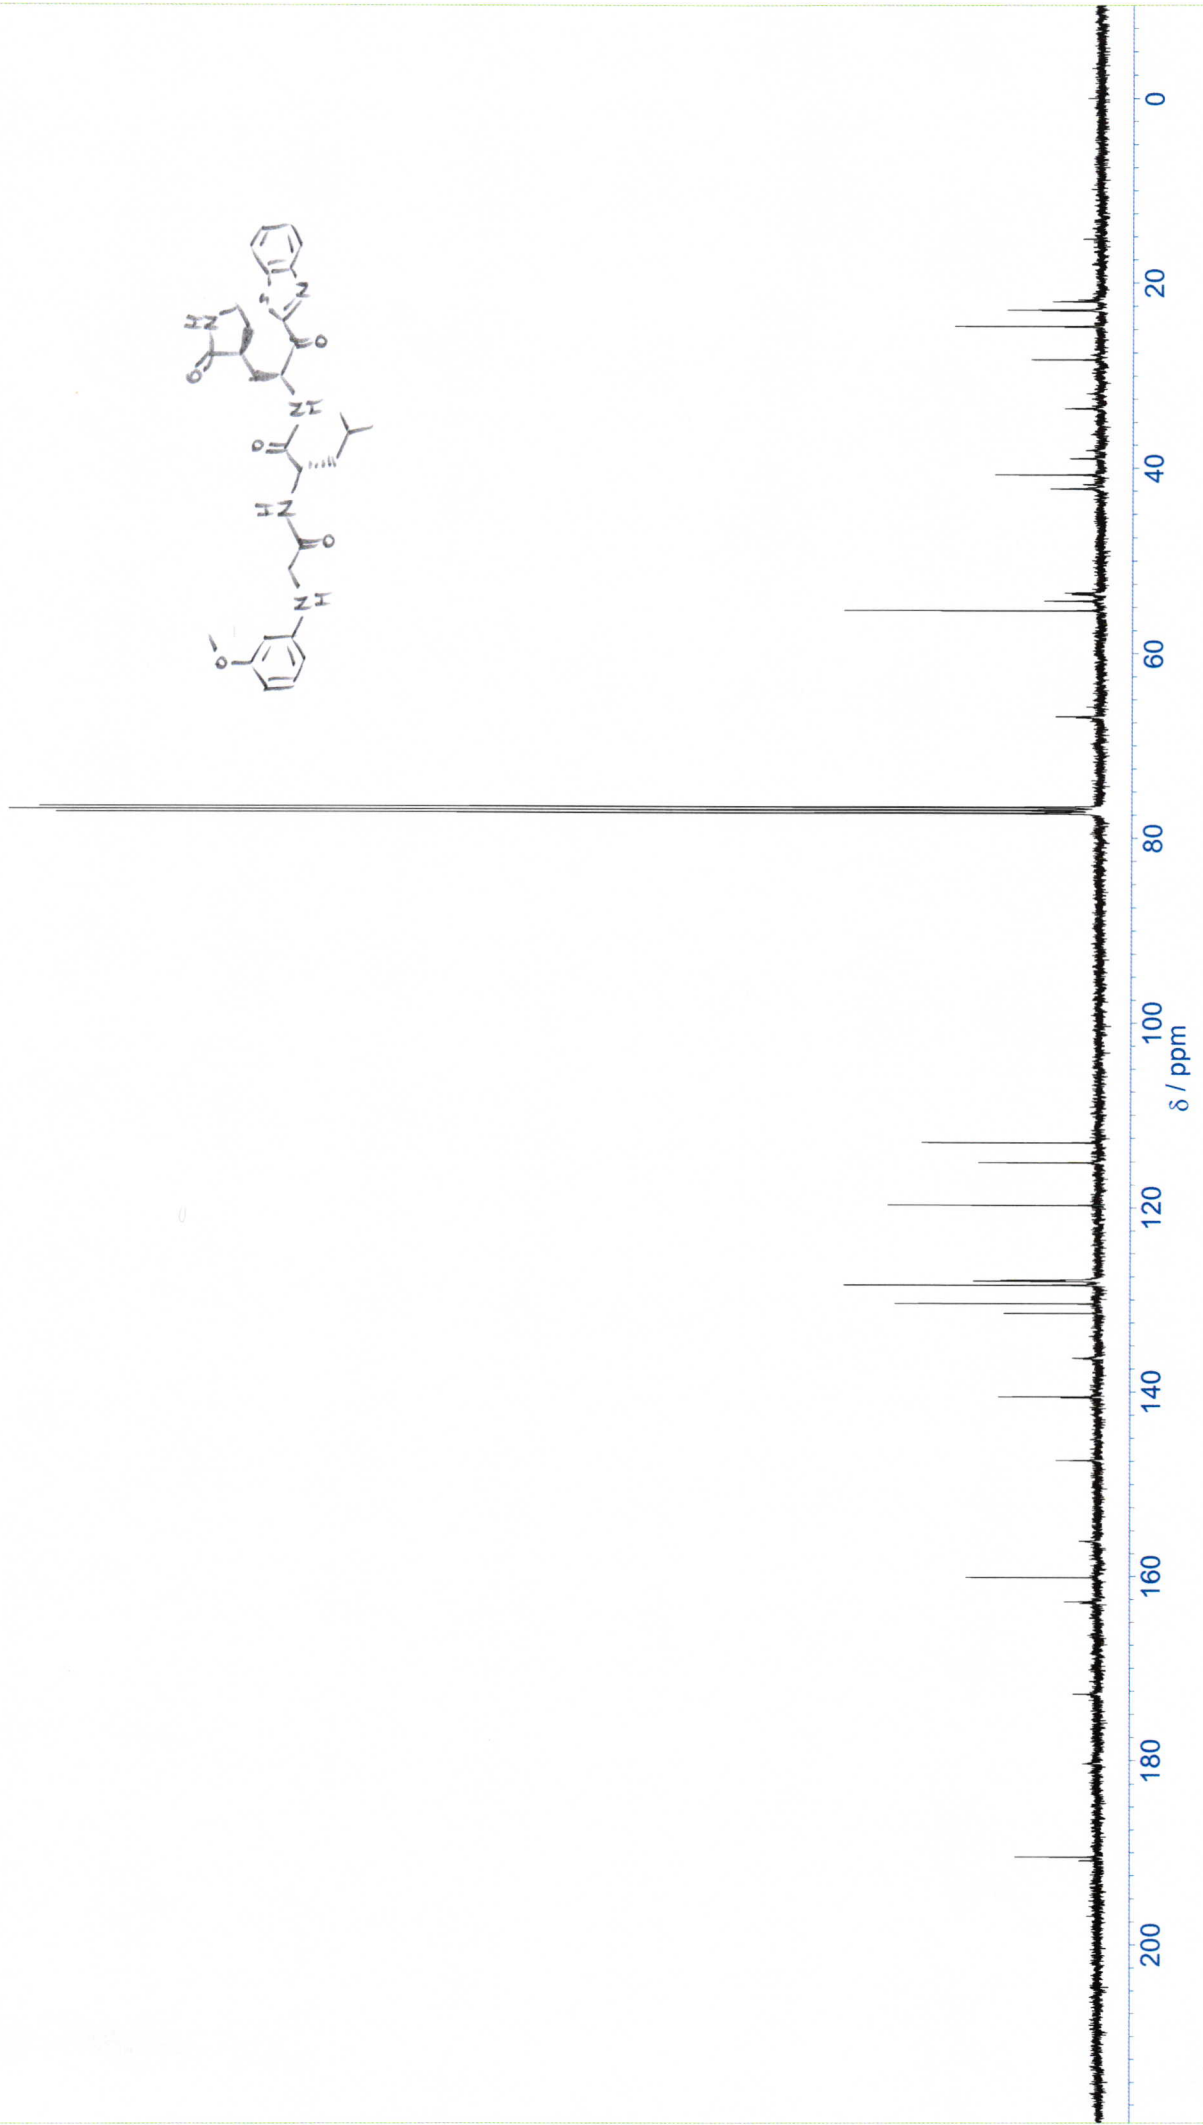

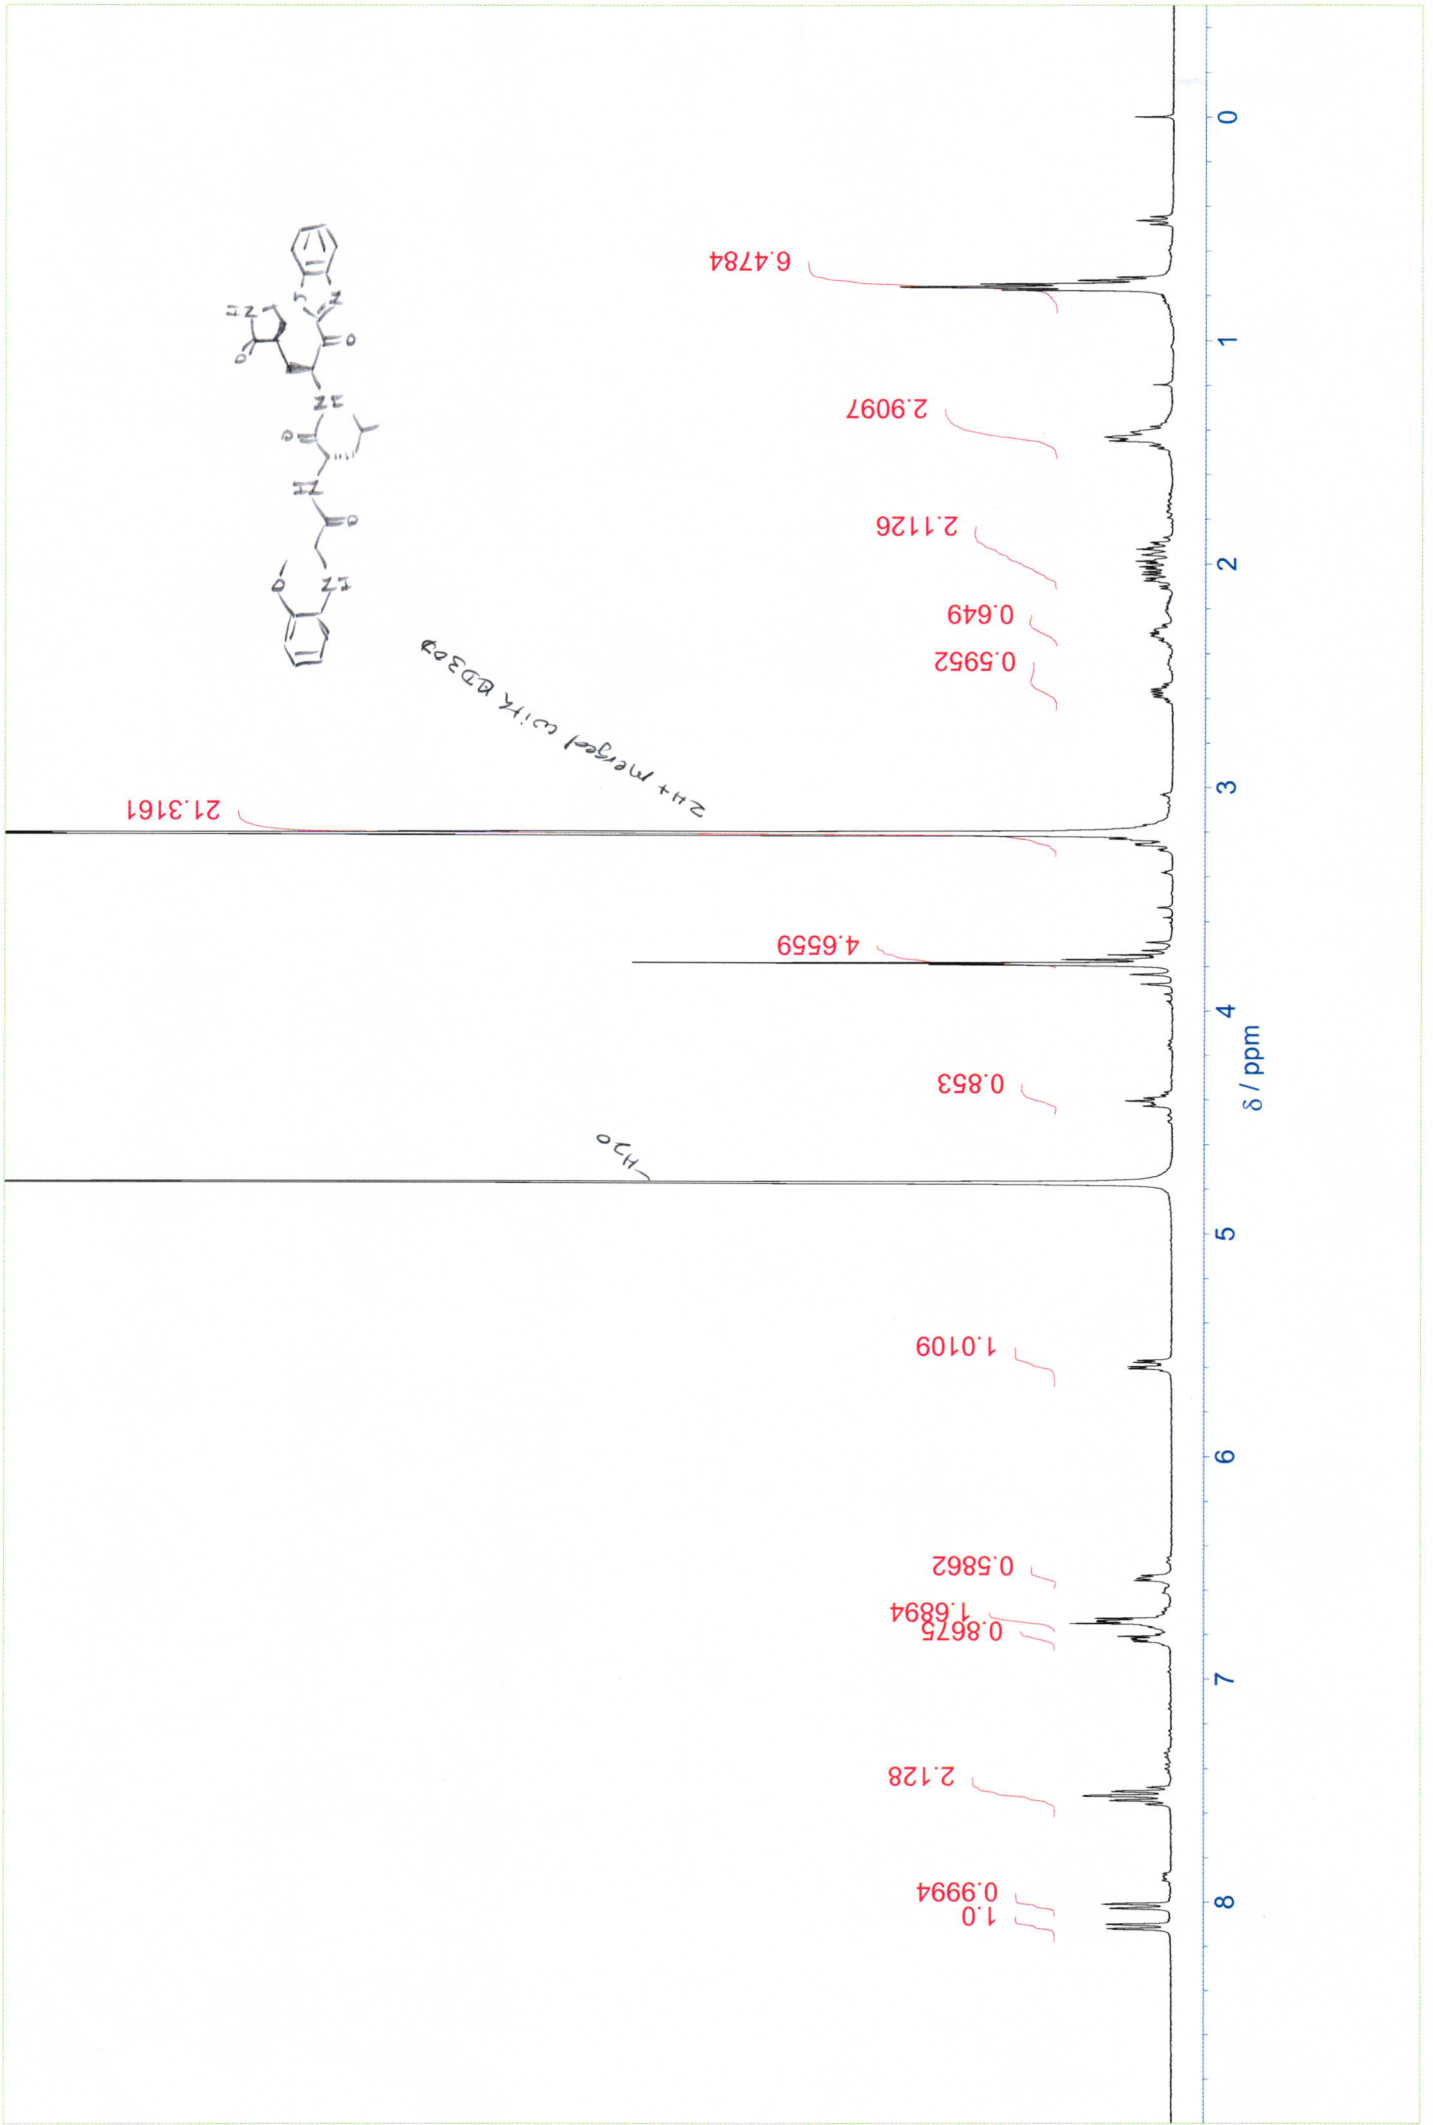

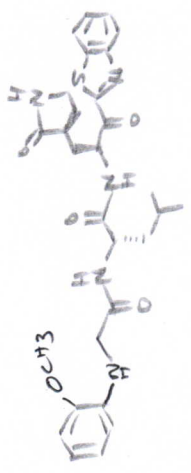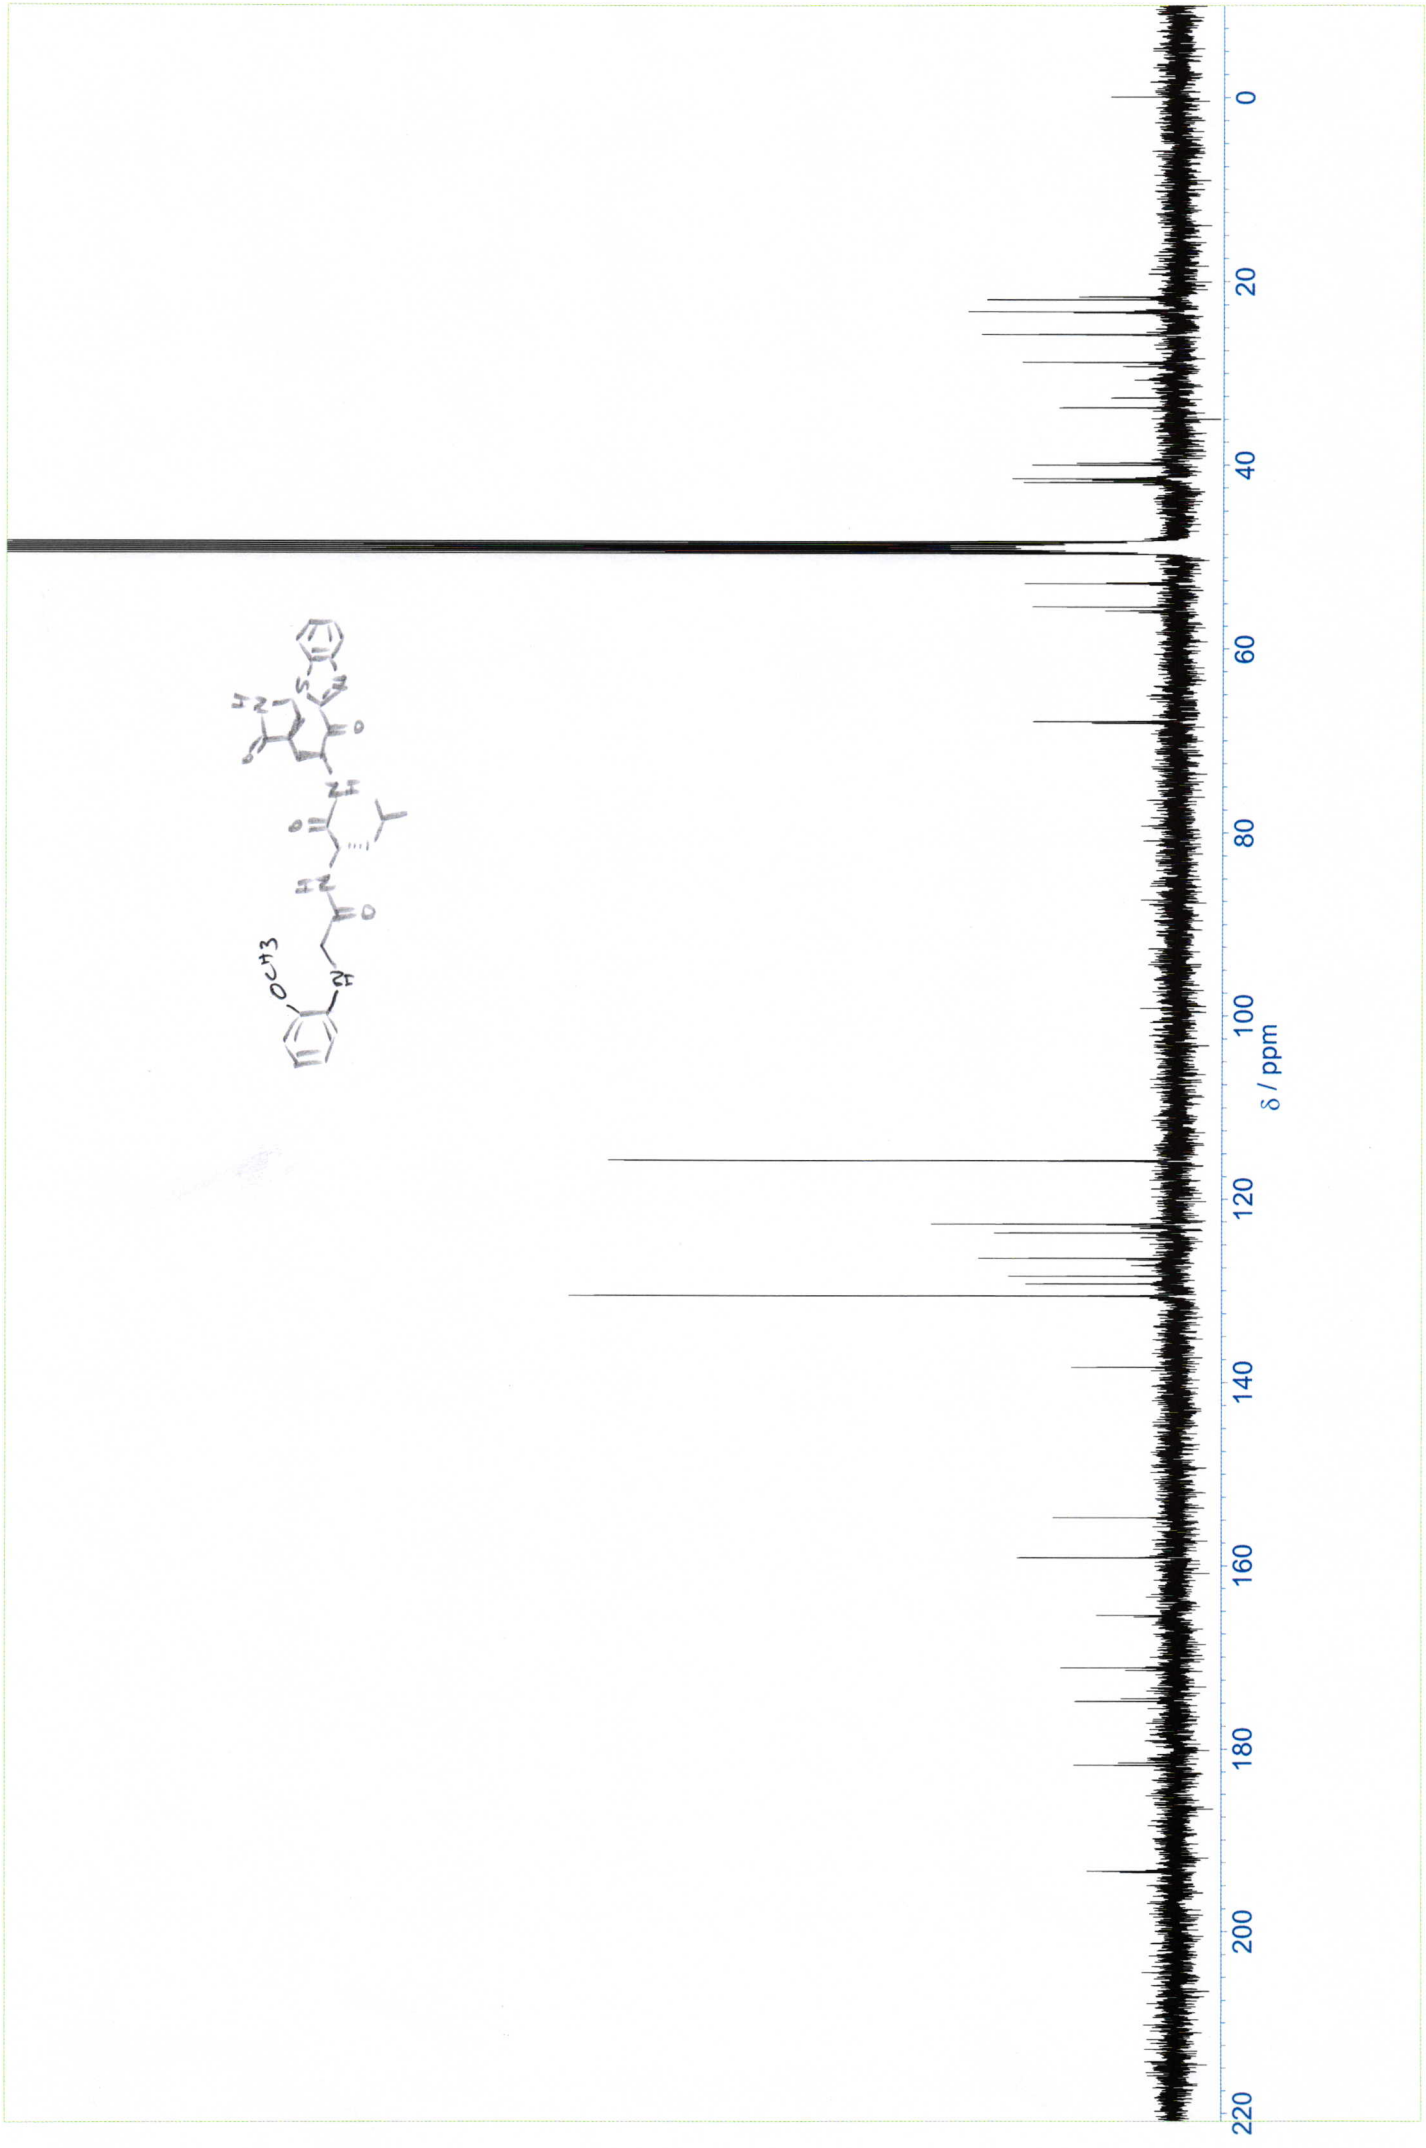

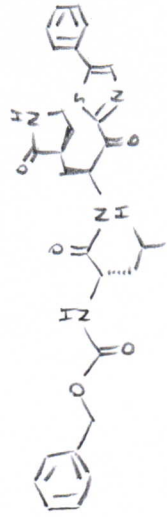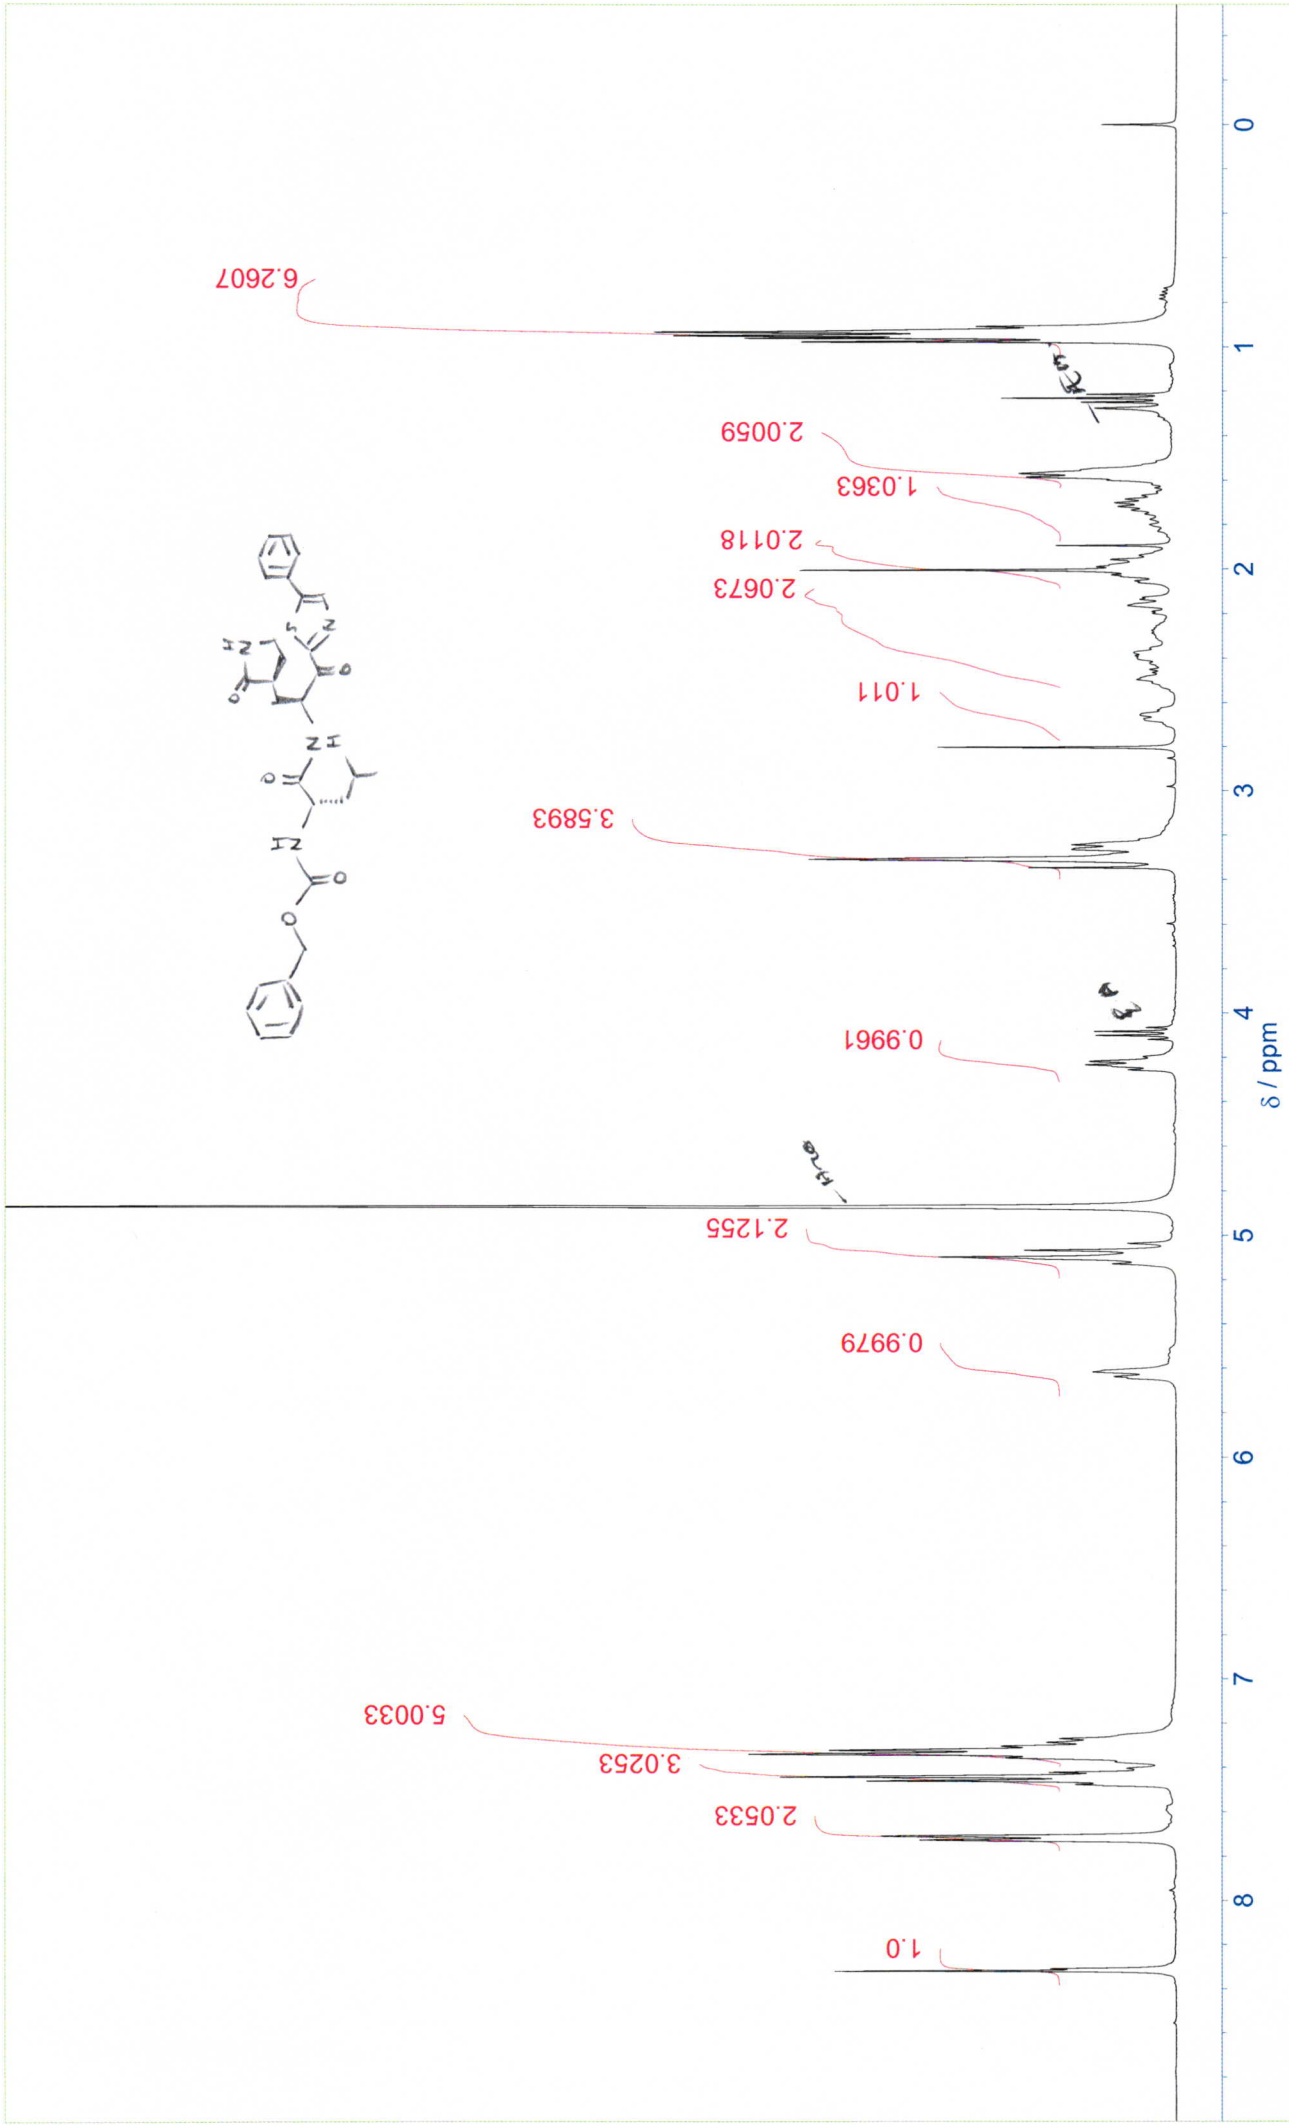

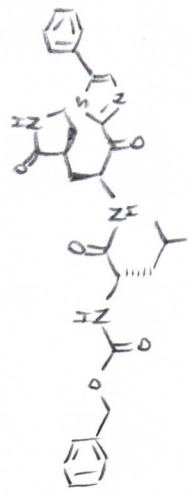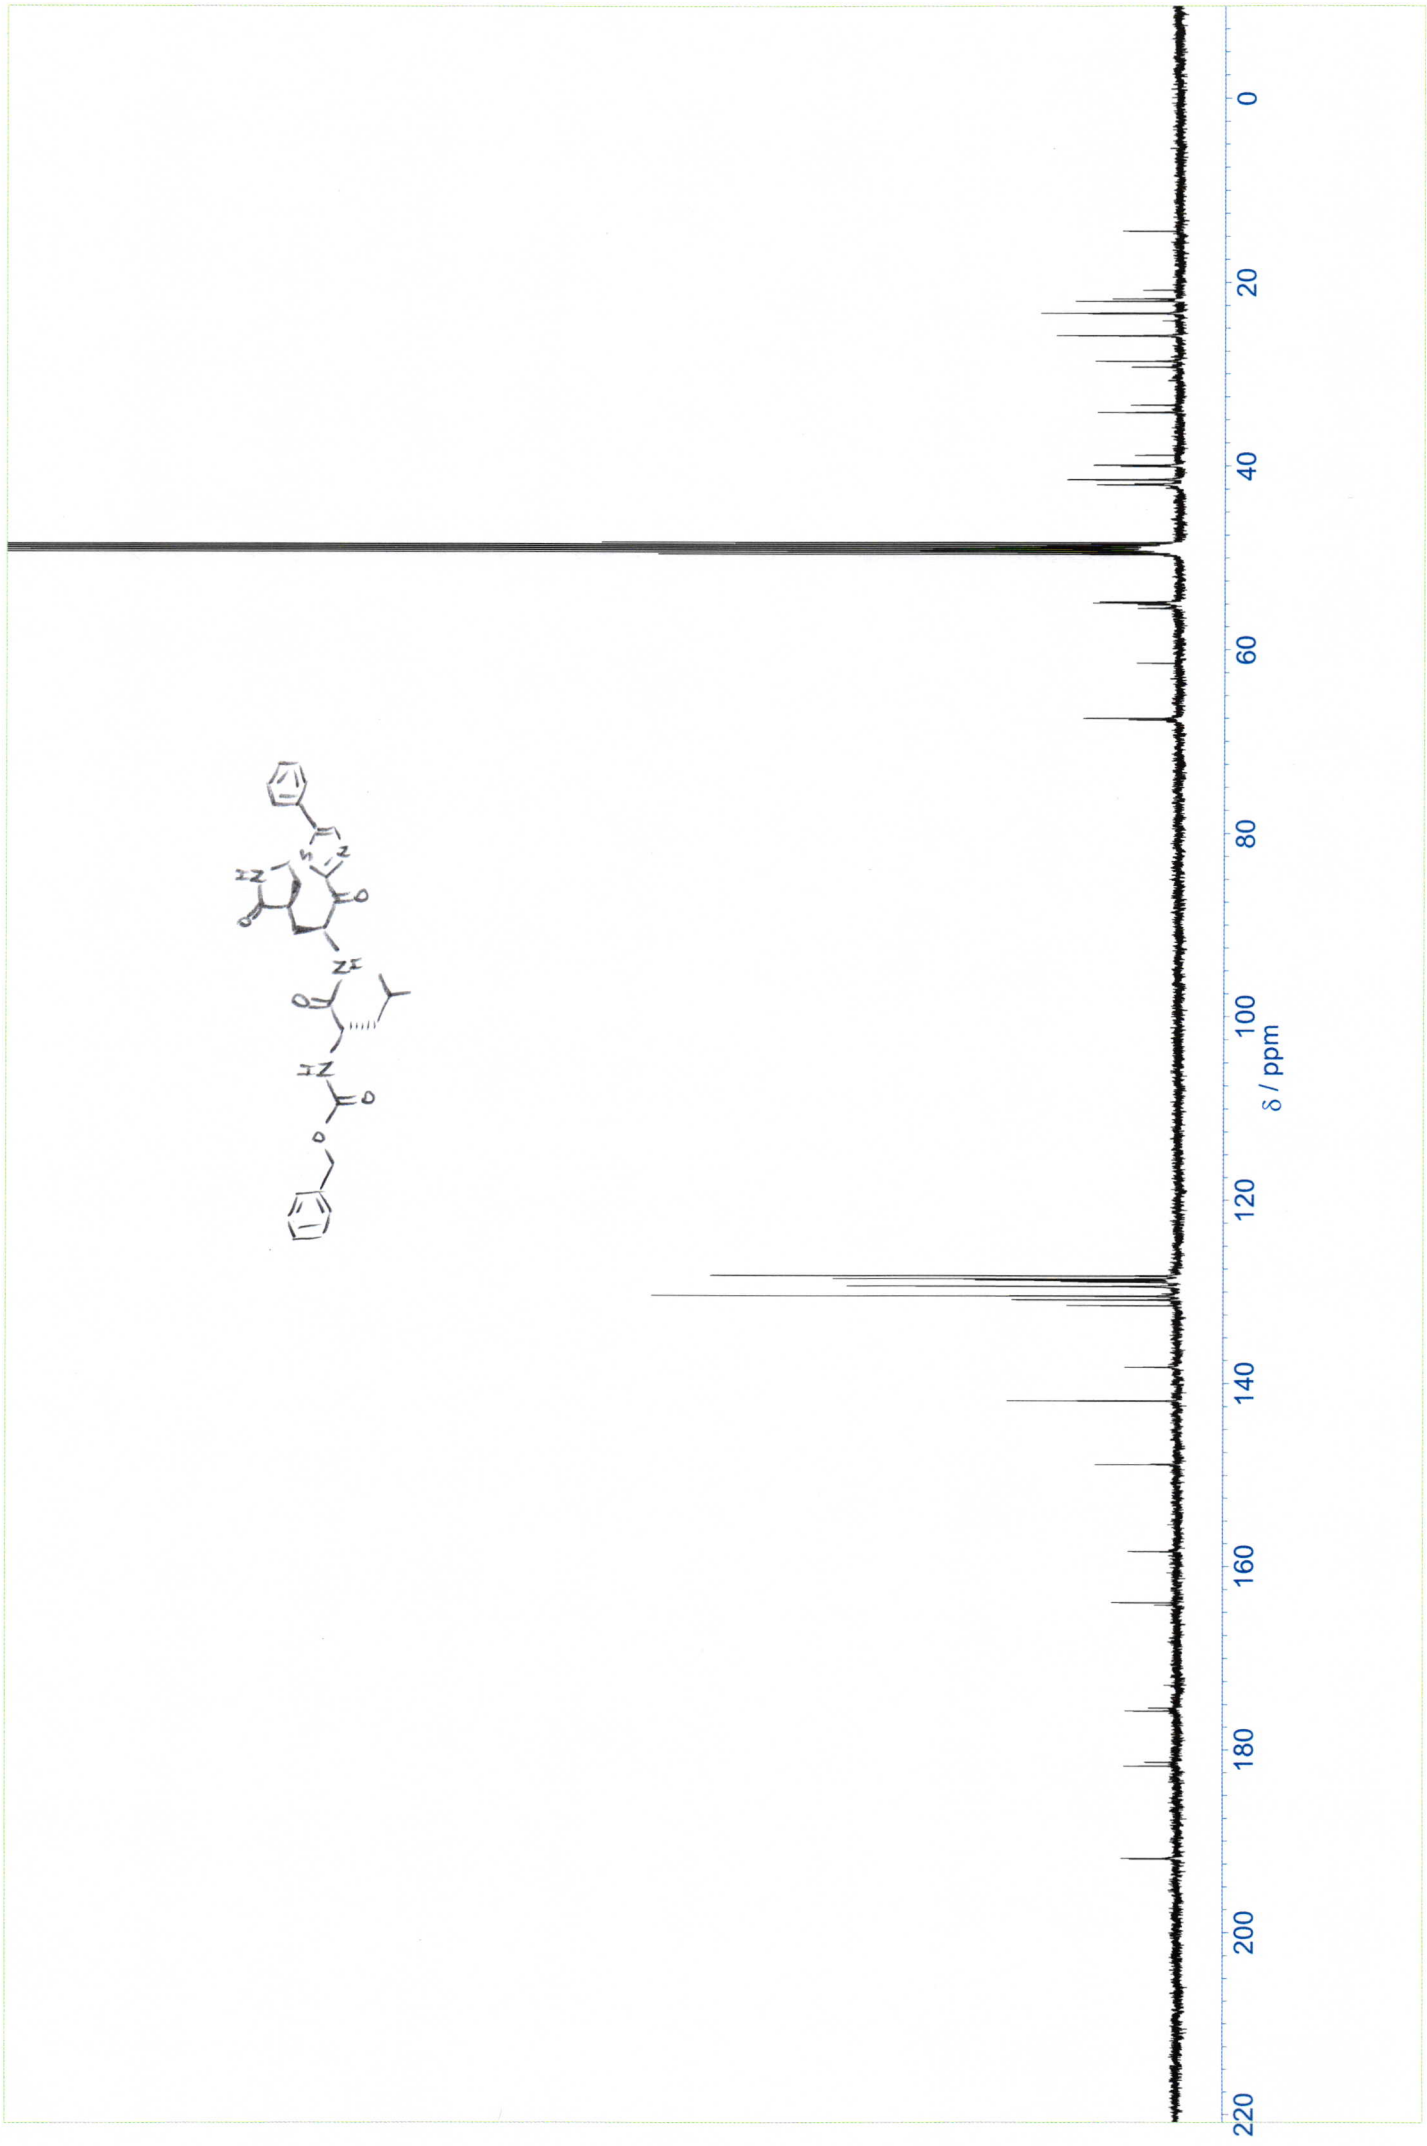

Supplement: mmc1.pdf [file mmc1.pdf]
